# Supplementary material for: Single-Nucleotide Polymorphism Markers from De-Novo Assembly of the Pomegranate Transcriptome Reveal Germplasm Genetic Diversity
Source: PLoS One. 2014 Feb 18;9(2):e88998. doi: 10.1371/journal.pone.0088998 (PMC3928336; doi:10.1371/journal.pone.0088998)
Supplement: Table S3 — Pomegranate accessions from the ARO germplasm collection. (XLSX) [file pone.0088998.s003.xlsx]

## Sheet: SSR_consensus
Contig_ID	Motif	Start	Number of motif repeats (MISA)	Number of motif repeats (SciRoKo)
pomegranate_rep_c1286	AAAC	54	5	3
pomegranate_rep_c17201	AAAC	304	8	7
pomegranate_rep_c18841	AAAC	59	5	3
pomegranate_rep_c56863	AAAC	37	5	3
pomegranate_rep_c9166	AAAC	163	5	3
pomegranate_rep_c5481	AAACC	44	6	4
pomegranate_rep_c1323	AAAG	1302	7	4
pomegranate_rep_c3449	AAAG	73	5	3
pomegranate_rep_c57481	AAAT	284	5	3
pomegranate_rep_c58078	AAAT	14	5	3
pomegranate_rep_c855	AAAT	43	5	3
pomegranate_rep_c10490	AAC	163	5	3
pomegranate_rep_c1262	AAC	916	10	6
pomegranate_rep_c21422	AAC	261	5	3
pomegranate_rep_c27744	AAC	356	7	4
pomegranate_rep_c56412	AAC	279	8	5
pomegranate_rep_c60008	AAC	239	5	6
pomegranate_rep_c7741	AAC	1380	5	3
pomegranate_rep_c993	AAC	199	6	4
pomegranate_rep_c46532	AACAC	292	7	5
pomegranate_c14936	AACAG	317	6	4
pomegranate_rep_c21801	AACAT	1020	5	4
pomegranate_rep_c65082	AACCA	23	5	3
pomegranate_c62535	AACT	348	5	3
pomegranate_rep_c34913	AACTC	419	6	4
pomegranate_c21641	AAG	657	11	6
pomegranate_c25928	AAG	1453	5	3
pomegranate_c26604	AAG	70	6	3
pomegranate_c28417	AAG	569	5	3
pomegranate_c29286	AAG	302	6	3
pomegranate_c30589	AAG	39	5	3
pomegranate_c38866	AAG	278	11	6
pomegranate_c40847	AAG	509	5	3
pomegranate_c53174	AAG	544	5	3
pomegranate_c60163	AAG	602	5	5
pomegranate_c60502	AAG	52	5	3
pomegranate_c61586	AAG	201	7	4
pomegranate_rep_c10480	AAG	646	6	3
pomegranate_rep_c10644	AAG	935	6	3
pomegranate_rep_c11393	AAG	29	6	3
pomegranate_rep_c11394	AAG	1551	11	7
pomegranate_rep_c12034	AAG	1494	5	5
pomegranate_rep_c12216	AAG	1129	6	3
pomegranate_rep_c12367	AAG	1218	5	7
pomegranate_rep_c12459	AAG	321	7	4
pomegranate_rep_c13219	AAG	499	7	4
pomegranate_rep_c1361	AAG	738	5	3
pomegranate_rep_c13641	AAG	448	5	6
pomegranate_rep_c13711	AAG	1268	10	6
pomegranate_rep_c14081	AAG	1137	6	5
pomegranate_rep_c14579	AAG	22	5	3
pomegranate_rep_c14792	AAG	166	5	3
pomegranate_rep_c1493	AAG	738	5	3
pomegranate_rep_c15283	AAG	412	6	4
pomegranate_rep_c15329	AAG	192	10	6
pomegranate_rep_c15339	AAG	373	5	3
pomegranate_rep_c15607	AAG	255	5	3
pomegranate_rep_c15983	AAG	87	5	3
pomegranate_rep_c16214	AAG	1321	6	3
pomegranate_rep_c17227	AAG	1131	7	4
pomegranate_rep_c17747	AAG	620	9	5
pomegranate_rep_c18076	AAG	488	5	3
pomegranate_rep_c18659	AAG	836	5	3
pomegranate_rep_c18693	AAG	657	7	4
pomegranate_rep_c18766	AAG	849	6	3
pomegranate_rep_c19749	AAG	80	8	4
pomegranate_rep_c20404	AAG	612	7	4
pomegranate_rep_c21607	AAG	463	7	4
pomegranate_rep_c22032	AAG	604	6	9
pomegranate_rep_c2231	AAG	1136	5	3
pomegranate_rep_c2284	AAG	620	5	3
pomegranate_rep_c23648	AAG	208	5	3
pomegranate_rep_c24446	AAG	153	6	3
pomegranate_rep_c2473	AAG	346	5	3
pomegranate_rep_c24738	AAG	282	7	4
pomegranate_rep_c25186	AAG	26	6	3
pomegranate_rep_c25488	AAG	154	5	3
pomegranate_rep_c25535	AAG	124	5	3
pomegranate_rep_c259	AAG	186	14	3
pomegranate_rep_c27292	AAG	65	6	4
pomegranate_rep_c27776	AAG	450	5	3
pomegranate_rep_c2790	AAG	1206	10	6
pomegranate_rep_c27959	AAG	22	8	6
pomegranate_rep_c28393	AAG	310	5	3
pomegranate_rep_c30349	AAG	138	7	4
pomegranate_rep_c32299	AAG	1331	7	4
pomegranate_rep_c32926	AAG	65	5	4
pomegranate_rep_c3495	AAG	1416	7	4
pomegranate_rep_c3512	AAG	1056	5	3
pomegranate_rep_c35712	AAG	353	5	3
pomegranate_rep_c36708	AAG	80	6	3
pomegranate_rep_c36772	AAG	297	7	8
pomegranate_rep_c37068	AAG	581	5	3
pomegranate_rep_c3713	AAG	1330	11	6
pomegranate_rep_c37717	AAG	146	7	4
pomegranate_rep_c38050	AAG	95	5	4
pomegranate_rep_c38358	AAG	103	6	4
pomegranate_rep_c38649	AAG	297	8	7
pomegranate_rep_c3960	AAG	82	5	3
pomegranate_rep_c39867	AAG	504	5	3
pomegranate_rep_c40713	AAG	133	5	3
pomegranate_rep_c41225	AAG	799	7	4
pomegranate_rep_c41612	AAG	53	6	4
pomegranate_rep_c4191	AAG	2139	5	5
pomegranate_rep_c42426	AAG	281	7	4
pomegranate_rep_c43440	AAG	20	5	3
pomegranate_rep_c47302	AAG	286	5	3
pomegranate_rep_c4739	AAG	227	10	6
pomegranate_rep_c47447	AAG	443	5	3
pomegranate_rep_c48023	AAG	103	5	3
pomegranate_rep_c48594	AAG	102	5	3
pomegranate_rep_c4886	AAG	269	11	6
pomegranate_rep_c4918	AAG	1762	5	3
pomegranate_rep_c49969	AAG	99	5	3
pomegranate_rep_c50081	AAG	97	7	4
pomegranate_rep_c51524	AAG	100	8	5
pomegranate_rep_c51550	AAG	156	6	3
pomegranate_rep_c51984	AAG	156	5	3
pomegranate_rep_c5216	AAG	916	8	4
pomegranate_rep_c54577	AAG	226	5	3
pomegranate_rep_c54684	AAG	115	5	3
pomegranate_rep_c5658	AAG	167	5	3
pomegranate_rep_c5687	AAG	1129	5	5
pomegranate_rep_c5691	AAG	900	5	3
pomegranate_rep_c5767	AAG	67	8	5
pomegranate_rep_c58369	AAG	78	6	4
pomegranate_rep_c58469	AAG	117	5	3
pomegranate_rep_c58763	AAG	360	5	3
pomegranate_rep_c59527	AAG	190	7	4
pomegranate_rep_c6057	AAG	207	5	3
pomegranate_rep_c6065	AAG	84	5	3
pomegranate_rep_c60808	AAG	56	6	4
pomegranate_rep_c62046	AAG	401	5	3
pomegranate_rep_c62822	AAG	81	5	3
pomegranate_rep_c63000	AAG	129	5	3
pomegranate_rep_c63165	AAG	103	7	4
pomegranate_rep_c64558	AAG	106	5	4
pomegranate_rep_c6477	AAG	729	7	4
pomegranate_rep_c65906	AAG	465	5	3
pomegranate_rep_c6608	AAG	2487	5	3
pomegranate_rep_c66194	AAG	54	5	3
pomegranate_rep_c6791	AAG	612	5	3
pomegranate_rep_c68134	AAG	359	5	3
pomegranate_rep_c6994	AAG	810	5	4
pomegranate_rep_c7426	AAG	238	7	4
pomegranate_rep_c7446	AAG	1727	9	5
pomegranate_rep_c7571	AAG	593	5	3
pomegranate_rep_c7747	AAG	1021	7	4
pomegranate_rep_c7907	AAG	184	6	3
pomegranate_rep_c8117	AAG	1816	7	4
pomegranate_rep_c8151	AAG	42	5	6
pomegranate_rep_c8433	AAG	1028	10	6
pomegranate_rep_c8538	AAG	1835	6	3
pomegranate_rep_c8575	AAG	78	8	4
pomegranate_rep_c8614	AAG	522	5	3
pomegranate_rep_c8980	AAG	1079	5	3
pomegranate_rep_c9123	AAG	143	6	3
pomegranate_rep_c9294	AAG	68	8	4
pomegranate_rep_c9976	AAG	665	5	3
pomegranate_rep_c998	AAG	289	7	4
pomegranate_rep_c10553	AAGA	63	5	3
pomegranate_rep_c13355	AAGA	1513	5	3
pomegranate_rep_c15877	AAGA	219	5	3
pomegranate_rep_c7496	AAGA	79	11	7
pomegranate_rep_c13283	AAGG	148	5	4
pomegranate_rep_c21128	AAGG	1389	5	3
pomegranate_rep_c739	AAGGA	608	7	5
pomegranate_c25453	AAT	121	5	3
pomegranate_c28676	AAT	228	5	3
pomegranate_c35566	AAT	90	5	3
pomegranate_c44192	AAT	685	8	5
pomegranate_c46164	AAT	23	6	4
pomegranate_c47451	AAT	432	11	7
pomegranate_c48695	AAT	368	9	5
pomegranate_c62237	AAT	149	16	9
pomegranate_rep_c10261	AAT	520	10	6
pomegranate_rep_c11029	AAT	1948	5	3
pomegranate_rep_c12122	AAT	530	5	3
pomegranate_rep_c12639	AAT	511	5	3
pomegranate_rep_c14021	AAT	41	6	3
pomegranate_rep_c16846	AAT	157	6	3
pomegranate_rep_c17770	AAT	997	5	3
pomegranate_rep_c18105	AAT	1232	6	3
pomegranate_rep_c19506	AAT	624	5	3
pomegranate_rep_c2113	AAT	971	5	3
pomegranate_rep_c22955	AAT	1437	7	4
pomegranate_rep_c2372	AAT	251	6	4
pomegranate_rep_c23908	AAT	134	5	3
pomegranate_rep_c24690	AAT	104	7	4
pomegranate_rep_c27737	AAT	9	9	5
pomegranate_rep_c32937	AAT	1180	6	3
pomegranate_rep_c33510	AAT	123	6	3
pomegranate_rep_c33568	AAT	227	7	4
pomegranate_rep_c33966	AAT	466	7	4
pomegranate_rep_c37351	AAT	211	5	3
pomegranate_rep_c40045	AAT	13	9	5
pomegranate_rep_c42504	AAT	65	5	3
pomegranate_rep_c42891	AAT	184	7	4
pomegranate_rep_c43947	AAT	129	9	5
pomegranate_rep_c45831	AAT	565	7	4
pomegranate_rep_c48289	AAT	186	5	5
pomegranate_rep_c51688	AAT	314	10	6
pomegranate_rep_c52022	AAT	20	6	4
pomegranate_rep_c53417	AAT	235	5	3
pomegranate_rep_c53502	AAT	130	5	3
pomegranate_rep_c53834	AAT	574	5	3
pomegranate_rep_c58836	AAT	661	6	3
pomegranate_rep_c60998	AAT	129	5	3
pomegranate_rep_c6289	AAT	189	11	6
pomegranate_rep_c6334	AAT	1348	8	4
pomegranate_rep_c64476	AAT	21	9	5
pomegranate_rep_c668	AAT	3	5	3
pomegranate_rep_c725	AAT	1667	6	3
pomegranate_rep_c7643	AAT	155	9	5
pomegranate_rep_c7937	AAT	804	5	3
pomegranate_rep_c8265	AAT	104	5	3
pomegranate_rep_c9388	AAT	1	7	4
pomegranate_c18350	AATA	19	5	3
pomegranate_c62863	AATC	841	5	3
pomegranate_rep_c35868	AATC	1721	6	4
pomegranate_rep_c45526	AATC	249	5	3
pomegranate_rep_c43888	AATCAA	393	5	3
pomegranate_c44190	AATG	195	5	3
pomegranate_c61467	AATG	385	5	3
pomegranate_c15726	AC	26	13	6
pomegranate_c17278	AC	43	7	3
pomegranate_c26030	AC	516	11	5
pomegranate_c30265	AC	1331	10	5
pomegranate_c46328	AC	730	9	4
pomegranate_c59091	AC	349	11	5
pomegranate_c61155	AC	660	13	6
pomegranate_c63893	AC	770	10	5
pomegranate_c64298	AC	101	10	5
pomegranate_c65196	AC	379	7	3
pomegranate_rep_c10538	AC	126	9	4
pomegranate_rep_c10572	AC	4	18	18
pomegranate_rep_c12861	AC	53	9	4
pomegranate_rep_c13803	AC	1851	9	4
pomegranate_rep_c16636	AC	623	8	4
pomegranate_rep_c17938	AC	581	7	3
pomegranate_rep_c20212	AC	152	11	5
pomegranate_rep_c23657	AC	57	20	10
pomegranate_rep_c25426	AC	156	8	4
pomegranate_rep_c26419	AC	525	7	3
pomegranate_rep_c26682	AC	482	8	4
pomegranate_rep_c27168	AC	627	11	5
pomegranate_rep_c29555	AC	826	8	4
pomegranate_rep_c32037	AC	874	8	4
pomegranate_rep_c34174	AC	301	8	4
pomegranate_rep_c3450	AC	125	10	5
pomegranate_rep_c34989	AC	566	7	3
pomegranate_rep_c35769	AC	652	10	5
pomegranate_rep_c36780	AC	329	10	5
pomegranate_rep_c41459	AC	441	19	9
pomegranate_rep_c41649	AC	898	8	4
pomegranate_rep_c42928	AC	56	9	4
pomegranate_rep_c44498	AC	65	11	5
pomegranate_rep_c47982	AC	1052	13	6
pomegranate_rep_c48501	AC	33	10	5
pomegranate_rep_c48960	AC	183	9	4
pomegranate_rep_c52585	AC	195	8	4
pomegranate_rep_c52782	AC	261	8	4
pomegranate_rep_c53175	AC	6	11	5
pomegranate_rep_c53334	AC	383	17	8
pomegranate_rep_c53492	AC	339	18	9
pomegranate_rep_c55352	AC	529	11	5
pomegranate_rep_c55685	AC	229	8	4
pomegranate_rep_c5858	AC	405	12	6
pomegranate_rep_c59883	AC	68	9	4
pomegranate_rep_c63177	AC	357	10	5
pomegranate_rep_c6461	AC	19	13	6
pomegranate_rep_c9009	AC	119	8	4
pomegranate_c27882	ACA	49	7	4
pomegranate_c58239	ACA	70	5	4
pomegranate_rep_c19116	ACA	99	8	5
pomegranate_rep_c3624	ACA	1388	7	4
pomegranate_rep_c7582	ACA	156	8	5
pomegranate_c63659	ACAAC	594	6	4
pomegranate_rep_c14076	ACACT	36	5	3
pomegranate_rep_c39269	ACAG	34	6	4
pomegranate_rep_c50110	ACAG	446	5	4
pomegranate_rep_c33914	ACAT	297	9	6
pomegranate_rep_c37606	ACAT	632	6	4
pomegranate_rep_c62791	ACAT	70	5	3
pomegranate_c53581	ACC	277	5	3
pomegranate_rep_c10885	ACC	691	5	3
pomegranate_rep_c11766	ACC	1406	6	3
pomegranate_rep_c12491	ACC	1994	7	4
pomegranate_rep_c1351	ACC	1260	5	3
pomegranate_rep_c14483	ACC	375	6	3
pomegranate_rep_c21311	ACC	281	7	4
pomegranate_rep_c26100	ACC	284	5	4
pomegranate_rep_c29807	ACC	187	6	4
pomegranate_rep_c350	ACC	233	5	3
pomegranate_rep_c42676	ACC	43	11	7
pomegranate_rep_c44278	ACC	77	5	3
pomegranate_rep_c49403	ACC	168	5	4
pomegranate_rep_c5305	ACC	213	6	3
pomegranate_rep_c6378	ACC	4864	9	5
pomegranate_rep_c65203	ACC	95	10	6
pomegranate_rep_c14316	ACCACG	300	5	4
pomegranate_rep_c2387	ACCACG	1487	6	4
pomegranate_rep_c30014	ACCACG	1212	6	4
pomegranate_rep_c46514	ACCACG	221	6	4
pomegranate_rep_c6715	ACCACG	213	6	4
pomegranate_rep_c591	ACCAT	237	5	3
pomegranate_rep_c46879	ACCG	82	5	3
pomegranate_rep_c19644	ACG	1	5	3
pomegranate_rep_c2085	ACG	682	5	3
pomegranate_rep_c5915	ACG	10	5	3
pomegranate_rep_c68681	ACG	377	8	4
pomegranate_c18412	ACGCCA	771	5	4
pomegranate_rep_c21427	ACGCCA	501	5	4
pomegranate_c40278	ACGG	482	5	3
pomegranate_rep_c41562	ACGG	699	6	4
pomegranate_c23464	ACT	67	7	6
pomegranate_c62771	ACT	52	5	3
pomegranate_rep_c12415	ACT	83	5	4
pomegranate_rep_c22160	ACT	290	5	3
pomegranate_rep_c29755	ACT	215	7	4
pomegranate_rep_c4894	ACT	638	5	3
pomegranate_rep_c55378	ACT	134	6	4
pomegranate_rep_c63971	ACT	198	5	3
pomegranate_rep_c51176	ACTAT	36	7	5
pomegranate_c10096	AG	3	17	8
pomegranate_c10248	AG	93	18	10
pomegranate_c10539	AG	1932	8	4
pomegranate_c10828	AG	1874	11	5
pomegranate_c12134	AG	1651	17	8
pomegranate_c12671	AG	1640	6	8
pomegranate_c13142	AG	1029	10	8
pomegranate_c13762	AG	58	6	5
pomegranate_c14456	AG	1406	15	7
pomegranate_c14536	AG	66	10	5
pomegranate_c14684	AG	56	10	5
pomegranate_c15065	AG	1370	9	4
pomegranate_c15171	AG	151	12	6
pomegranate_c15260	AG	1160	7	3
pomegranate_c16024	AG	1627	20	10
pomegranate_c16413	AG	1	20	10
pomegranate_c16458	AG	2017	9	4
pomegranate_c16787	AG	35	10	5
pomegranate_c16919	AG	1043	10	5
pomegranate_c16931	AG	2770	11	5
pomegranate_c17009	AG	806	8	4
pomegranate_c17057	AG	2508	6	7
pomegranate_c17198	AG	1917	10	5
pomegranate_c17221	AG	347	9	4
pomegranate_c17506	AG	892	13	6
pomegranate_c17632	AG	1037	19	9
pomegranate_c17953	AG	1137	16	8
pomegranate_c18280	AG	1309	9	4
pomegranate_c18519	AG	1352	9	8
pomegranate_c18817	AG	77	9	4
pomegranate_c19070	AG	1346	7	3
pomegranate_c19371	AG	22	9	8
pomegranate_c19379	AG	1	18	9
pomegranate_c19950	AG	1	12	6
pomegranate_c20100	AG	969	11	5
pomegranate_c20707	AG	950	10	8
pomegranate_c20925	AG	1939	12	6
pomegranate_c22358	AG	771	11	5
pomegranate_c22811	AG	734	10	5
pomegranate_c23108	AG	1601	9	4
pomegranate_c23157	AG	1451	18	9
pomegranate_c24188	AG	5	10	5
pomegranate_c24604	AG	1337	17	8
pomegranate_c24619	AG	481	12	6
pomegranate_c24956	AG	1103	14	7
pomegranate_c25835	AG	59	8	4
pomegranate_c26371	AG	1201	11	5
pomegranate_c26604	AG	657	11	5
pomegranate_c26806	AG	12	12	6
pomegranate_c27300	AG	5	12	6
pomegranate_c27626	AG	904	9	4
pomegranate_c29291	AG	1302	12	6
pomegranate_c29389	AG	1006	9	4
pomegranate_c29519	AG	1080	10	5
pomegranate_c29599	AG	1738	10	5
pomegranate_c29995	AG	580	18	9
pomegranate_c30865	AG	951	14	9
pomegranate_c31154	AG	810	8	4
pomegranate_c31810	AG	25	12	6
pomegranate_c32827	AG	235	14	7
pomegranate_c33105	AG	16	10	5
pomegranate_c33299	AG	530	25	12
pomegranate_c34041	AG	1257	9	4
pomegranate_c34417	AG	106	13	6
pomegranate_c36084	AG	1163	14	7
pomegranate_c36362	AG	558	9	4
pomegranate_c36627	AG	544	9	4
pomegranate_c37928	AG	1270	10	5
pomegranate_c38282	AG	409	7	7
pomegranate_c38469	AG	392	11	5
pomegranate_c40014	AG	515	7	3
pomegranate_c40062	AG	459	8	4
pomegranate_c40150	AG	24	11	5
pomegranate_c40400	AG	1094	11	5
pomegranate_c41787	AG	6	10	5
pomegranate_c42397	AG	630	11	5
pomegranate_c42868	AG	773	15	7
pomegranate_c43011	AG	546	9	4
pomegranate_c46078	AG	1	19	9
pomegranate_c46095	AG	1165	9	4
pomegranate_c49170	AG	493	12	6
pomegranate_c49546	AG	349	16	8
pomegranate_c50457	AG	595	7	3
pomegranate_c51792	AG	963	12	6
pomegranate_c51862	AG	362	15	7
pomegranate_c51948	AG	670	10	5
pomegranate_c52117	AG	513	8	4
pomegranate_c52721	AG	189	9	4
pomegranate_c53704	AG	596	11	5
pomegranate_c54001	AG	20	9	4
pomegranate_c54038	AG	432	17	8
pomegranate_c56133	AG	734	7	3
pomegranate_c57292	AG	436	7	3
pomegranate_c57717	AG	862	14	7
pomegranate_c58250	AG	201	17	8
pomegranate_c59110	AG	448	10	5
pomegranate_c59847	AG	50	8	4
pomegranate_c60420	AG	93	14	7
pomegranate_c60791	AG	605	10	5
pomegranate_c61289	AG	31	15	7
pomegranate_c61323	AG	195	16	8
pomegranate_c61437	AG	24	17	8
pomegranate_c61584	AG	5	10	5
pomegranate_c61750	AG	173	8	4
pomegranate_c63397	AG	74	15	7
pomegranate_c64014	AG	34	13	8
pomegranate_c64023	AG	17	12	6
pomegranate_c64062	AG	106	13	6
pomegranate_c64367	AG	48	9	4
pomegranate_c64552	AG	94	8	4
pomegranate_c64833	AG	15	11	5
pomegranate_c65175	AG	82	10	5
pomegranate_c65492	AG	5	12	6
pomegranate_c65909	AG	72	10	5
pomegranate_c9480	AG	3	17	9
pomegranate_c9747	AG	1101	20	10
pomegranate_c9794	AG	55	11	5
pomegranate_rep_c1003	AG	1	7	11
pomegranate_rep_c10033	AG	1295	15	7
pomegranate_rep_c10089	AG	807	8	4
pomegranate_rep_c10146	AG	1	13	6
pomegranate_rep_c10153	AG	1302	9	4
pomegranate_rep_c10174	AG	767	9	4
pomegranate_rep_c10195	AG	1047	9	4
pomegranate_rep_c10207	AG	1490	8	4
pomegranate_rep_c10271	AG	1088	10	5
pomegranate_rep_c10287	AG	2089	8	4
pomegranate_rep_c10303	AG	1435	7	3
pomegranate_rep_c10306	AG	34	8	4
pomegranate_rep_c10325	AG	10	11	5
pomegranate_rep_c10330	AG	48	7	3
pomegranate_rep_c10342	AG	2335	15	7
pomegranate_rep_c10483	AG	2715	9	4
pomegranate_rep_c10501	AG	1631	9	4
pomegranate_rep_c10542	AG	47	7	3
pomegranate_rep_c10659	AG	2696	9	4
pomegranate_rep_c10713	AG	51	14	7
pomegranate_rep_c10786	AG	537	12	6
pomegranate_rep_c10830	AG	2398	10	5
pomegranate_rep_c10837	AG	888	8	4
pomegranate_rep_c10840	AG	1	19	11
pomegranate_rep_c10935	AG	1657	8	4
pomegranate_rep_c10987	AG	1732	14	7
pomegranate_rep_c10988	AG	1391	14	7
pomegranate_rep_c10992	AG	1260	8	4
pomegranate_rep_c11074	AG	14	8	4
pomegranate_rep_c11117	AG	994	8	4
pomegranate_rep_c11228	AG	978	12	6
pomegranate_rep_c11279	AG	1370	14	7
pomegranate_rep_c11291	AG	1307	9	4
pomegranate_rep_c11446	AG	29	10	5
pomegranate_rep_c1159	AG	734	12	6
pomegranate_rep_c11699	AG	1759	9	4
pomegranate_rep_c11704	AG	1735	8	4
pomegranate_rep_c11781	AG	903	7	3
pomegranate_rep_c11843	AG	1855	9	4
pomegranate_rep_c11876	AG	22	13	6
pomegranate_rep_c11885	AG	1	13	6
pomegranate_rep_c11914	AG	4	10	6
pomegranate_rep_c12012	AG	1295	11	5
pomegranate_rep_c12038	AG	992	10	5
pomegranate_rep_c12041	AG	75	10	5
pomegranate_rep_c12119	AG	898	8	4
pomegranate_rep_c1217	AG	754	11	5
pomegranate_rep_c12173	AG	1341	15	7
pomegranate_rep_c12276	AG	51	11	5
pomegranate_rep_c12319	AG	9	12	6
pomegranate_rep_c12359	AG	176	10	5
pomegranate_rep_c12501	AG	1104	12	6
pomegranate_rep_c12512	AG	1883	6	5
pomegranate_rep_c12560	AG	264	8	4
pomegranate_rep_c12618	AG	792	8	4
pomegranate_rep_c1277	AG	830	6	5
pomegranate_rep_c12807	AG	1076	7	5
pomegranate_rep_c12838	AG	221	9	4
pomegranate_rep_c12879	AG	1014	8	4
pomegranate_rep_c1290	AG	2092	10	7
pomegranate_rep_c1300	AG	1176	9	4
pomegranate_rep_c13035	AG	748	15	10
pomegranate_rep_c13047	AG	788	17	8
pomegranate_rep_c13190	AG	971	9	7
pomegranate_rep_c13244	AG	897	9	4
pomegranate_rep_c13337	AG	1618	8	5
pomegranate_rep_c1340	AG	925	12	6
pomegranate_rep_c13413	AG	123	16	8
pomegranate_rep_c13414	AG	1113	13	9
pomegranate_rep_c13422	AG	224	13	6
pomegranate_rep_c13425	AG	737	7	5
pomegranate_rep_c13476	AG	1384	12	6
pomegranate_rep_c13493	AG	1418	7	3
pomegranate_rep_c1351	AG	1016	12	8
pomegranate_rep_c13545	AG	12	7	3
pomegranate_rep_c1362	AG	912	13	6
pomegranate_rep_c13672	AG	109	7	3
pomegranate_rep_c13739	AG	862	8	4
pomegranate_rep_c13771	AG	126	9	4
pomegranate_rep_c13870	AG	1712	16	8
pomegranate_rep_c13924	AG	1528	11	5
pomegranate_rep_c13996	AG	105	8	4
pomegranate_rep_c14040	AG	852	12	6
pomegranate_rep_c14044	AG	1027	9	4
pomegranate_rep_c14050	AG	55	13	6
pomegranate_rep_c14127	AG	251	9	4
pomegranate_rep_c14164	AG	1107	12	6
pomegranate_rep_c14204	AG	738	7	5
pomegranate_rep_c14277	AG	1527	13	6
pomegranate_rep_c14315	AG	689	14	7
pomegranate_rep_c14345	AG	29	15	7
pomegranate_rep_c14414	AG	1189	16	8
pomegranate_rep_c14645	AG	380	8	4
pomegranate_rep_c1470	AG	1004	10	5
pomegranate_rep_c1477	AG	1456	44	22
pomegranate_rep_c14796	AG	1394	11	5
pomegranate_rep_c14926	AG	1607	6	5
pomegranate_rep_c1497	AG	58	9	4
pomegranate_rep_c14995	AG	1591	7	3
pomegranate_rep_c15086	AG	1779	14	7
pomegranate_rep_c15138	AG	11	8	4
pomegranate_rep_c15154	AG	603	8	4
pomegranate_rep_c15474	AG	670	11	5
pomegranate_rep_c15483	AG	2588	8	4
pomegranate_rep_c15530	AG	48	8	4
pomegranate_rep_c15627	AG	30	7	3
pomegranate_rep_c15694	AG	188	13	6
pomegranate_rep_c15773	AG	642	6	9
pomegranate_rep_c15900	AG	883	8	4
pomegranate_rep_c15954	AG	525	10	5
pomegranate_rep_c16018	AG	30	20	10
pomegranate_rep_c16049	AG	847	13	6
pomegranate_rep_c16109	AG	109	9	4
pomegranate_rep_c16223	AG	1981	12	6
pomegranate_rep_c16399	AG	656	8	4
pomegranate_rep_c16421	AG	1045	13	6
pomegranate_rep_c16566	AG	11	11	5
pomegranate_rep_c16601	AG	544	7	6
pomegranate_rep_c16695	AG	23	10	5
pomegranate_rep_c16697	AG	1007	10	5
pomegranate_rep_c16757	AG	1	18	9
pomegranate_rep_c16950	AG	687	8	4
pomegranate_rep_c16951	AG	1330	15	7
pomegranate_rep_c16960	AG	1	15	7
pomegranate_rep_c17143	AG	933	9	4
pomegranate_rep_c1730	AG	906	11	5
pomegranate_rep_c17317	AG	1361	9	4
pomegranate_rep_c17335	AG	650	9	4
pomegranate_rep_c17434	AG	171	10	5
pomegranate_rep_c1747	AG	205	10	5
pomegranate_rep_c17635	AG	786	8	4
pomegranate_rep_c1767	AG	2165	10	5
pomegranate_rep_c17691	AG	196	7	3
pomegranate_rep_c17703	AG	879	24	12
pomegranate_rep_c1775	AG	153	9	4
pomegranate_rep_c18020	AG	271	9	4
pomegranate_rep_c18034	AG	21	13	6
pomegranate_rep_c18044	AG	583	7	6
pomegranate_rep_c18076	AG	2	15	7
pomegranate_rep_c18152	AG	29	8	4
pomegranate_rep_c18271	AG	79	8	4
pomegranate_rep_c18282	AG	46	13	6
pomegranate_rep_c18285	AG	605	12	8
pomegranate_rep_c18319	AG	1159	17	8
pomegranate_rep_c18358	AG	283	9	4
pomegranate_rep_c18622	AG	772	13	6
pomegranate_rep_c18623	AG	897	14	7
pomegranate_rep_c1867	AG	130	8	6
pomegranate_rep_c18694	AG	71	7	3
pomegranate_rep_c18750	AG	17	8	4
pomegranate_rep_c1888	AG	1	19	9
pomegranate_rep_c18920	AG	103	16	8
pomegranate_rep_c19006	AG	1391	12	6
pomegranate_rep_c1907	AG	1830	14	7
pomegranate_rep_c19090	AG	587	11	5
pomegranate_rep_c19199	AG	534	13	6
pomegranate_rep_c19481	AG	1046	8	4
pomegranate_rep_c19509	AG	521	6	9
pomegranate_rep_c19565	AG	143	9	4
pomegranate_rep_c19639	AG	446	13	6
pomegranate_rep_c19682	AG	595	10	5
pomegranate_rep_c19683	AG	28	13	6
pomegranate_rep_c19703	AG	1612	14	7
pomegranate_rep_c19769	AG	78	8	4
pomegranate_rep_c19795	AG	538	15	7
pomegranate_rep_c19838	AG	930	16	8
pomegranate_rep_c1988	AG	1329	10	5
pomegranate_rep_c1989	AG	549	15	7
pomegranate_rep_c19937	AG	1124	10	5
pomegranate_rep_c1995	AG	1535	11	8
pomegranate_rep_c1997	AG	12	11	5
pomegranate_rep_c19979	AG	637	6	5
pomegranate_rep_c20006	AG	1	15	7
pomegranate_rep_c2006	AG	2605	11	5
pomegranate_rep_c20068	AG	1350	7	3
pomegranate_rep_c20157	AG	1158	12	6
pomegranate_rep_c2022	AG	87	12	6
pomegranate_rep_c20220	AG	390	10	5
pomegranate_rep_c20271	AG	82	11	5
pomegranate_rep_c20284	AG	801	8	4
pomegranate_rep_c20306	AG	1733	11	5
pomegranate_rep_c20334	AG	550	10	5
pomegranate_rep_c20401	AG	479	13	6
pomegranate_rep_c20437	AG	95	10	5
pomegranate_rep_c20477	AG	582	10	5
pomegranate_rep_c20524	AG	181	10	5
pomegranate_rep_c20555	AG	5	13	6
pomegranate_rep_c20568	AG	6	8	4
pomegranate_rep_c20768	AG	727	8	4
pomegranate_rep_c20882	AG	966	15	7
pomegranate_rep_c20948	AG	1127	6	7
pomegranate_rep_c2102	AG	808	15	7
pomegranate_rep_c21106	AG	281	11	8
pomegranate_rep_c21308	AG	184	10	5
pomegranate_rep_c21417	AG	90	8	4
pomegranate_rep_c21427	AG	222	8	4
pomegranate_rep_c2147	AG	1727	12	6
pomegranate_rep_c21561	AG	335	14	7
pomegranate_rep_c21673	AG	557	8	4
pomegranate_rep_c22001	AG	1559	7	3
pomegranate_rep_c2216	AG	1407	13	6
pomegranate_rep_c22245	AG	2429	15	7
pomegranate_rep_c224	AG	10	16	8
pomegranate_rep_c22403	AG	1144	12	6
pomegranate_rep_c2244	AG	3268	13	6
pomegranate_rep_c2259	AG	76	9	4
pomegranate_rep_c2269	AG	2200	19	9
pomegranate_rep_c22782	AG	590	8	4
pomegranate_rep_c22808	AG	609	12	6
pomegranate_rep_c229	AG	871	10	5
pomegranate_rep_c23034	AG	911	12	6
pomegranate_rep_c23062	AG	356	11	5
pomegranate_rep_c2319	AG	1222	7	5
pomegranate_rep_c2328	AG	1631	8	4
pomegranate_rep_c23281	AG	979	10	5
pomegranate_rep_c23359	AG	8	8	4
pomegranate_rep_c2348	AG	205	7	7
pomegranate_rep_c2349	AG	1	40	20
pomegranate_rep_c23515	AG	337	11	5
pomegranate_rep_c23529	AG	928	10	5
pomegranate_rep_c23556	AG	1	45	22
pomegranate_rep_c23596	AG	358	6	17
pomegranate_rep_c2374	AG	1840	21	8
pomegranate_rep_c23744	AG	698	14	7
pomegranate_rep_c23756	AG	125	10	5
pomegranate_rep_c2380	AG	1556	8	6
pomegranate_rep_c23865	AG	1318	13	6
pomegranate_rep_c2399	AG	1411	13	6
pomegranate_rep_c2406	AG	8	13	6
pomegranate_rep_c24200	AG	2	13	6
pomegranate_rep_c24222	AG	526	8	4
pomegranate_rep_c246	AG	882	10	5
pomegranate_rep_c24611	AG	546	8	4
pomegranate_rep_c24703	AG	254	7	3
pomegranate_rep_c24752	AG	65	11	8
pomegranate_rep_c24792	AG	58	8	8
pomegranate_rep_c24981	AG	439	8	4
pomegranate_rep_c24992	AG	1802	11	5
pomegranate_rep_c24995	AG	658	16	8
pomegranate_rep_c24996	AG	633	21	10
pomegranate_rep_c2508	AG	770	8	4
pomegranate_rep_c25270	AG	496	7	3
pomegranate_rep_c2537	AG	831	11	5
pomegranate_rep_c25370	AG	924	7	3
pomegranate_rep_c25428	AG	700	9	4
pomegranate_rep_c25478	AG	43	12	6
pomegranate_rep_c25494	AG	530	14	7
pomegranate_rep_c25605	AG	717	14	10
pomegranate_rep_c25726	AG	354	11	5
pomegranate_rep_c2574	AG	105	6	5
pomegranate_rep_c2580	AG	3585	11	5
pomegranate_rep_c25914	AG	680	7	5
pomegranate_rep_c25999	AG	509	10	6
pomegranate_rep_c26092	AG	104	10	5
pomegranate_rep_c2613	AG	41	14	7
pomegranate_rep_c26141	AG	1188	18	9
pomegranate_rep_c2616	AG	692	12	6
pomegranate_rep_c26239	AG	363	10	5
pomegranate_rep_c26249	AG	413	8	4
pomegranate_rep_c26358	AG	432	9	4
pomegranate_rep_c26358	AG	624	10	5
pomegranate_rep_c2645	AG	2576	23	14
pomegranate_rep_c26510	AG	279	11	5
pomegranate_rep_c2663	AG	1137	8	4
pomegranate_rep_c26659	AG	995	7	6
pomegranate_rep_c268	AG	760	11	5
pomegranate_rep_c2684	AG	66	15	6
pomegranate_rep_c27013	AG	488	17	8
pomegranate_rep_c27072	AG	470	9	4
pomegranate_rep_c271	AG	2968	9	4
pomegranate_rep_c2713	AG	1044	6	5
pomegranate_rep_c2715	AG	1038	9	4
pomegranate_rep_c27236	AG	506	11	5
pomegranate_rep_c27261	AG	450	8	4
pomegranate_rep_c27396	AG	2354	13	6
pomegranate_rep_c27430	AG	1184	6	6
pomegranate_rep_c2757	AG	1488	7	3
pomegranate_rep_c277	AG	81	7	7
pomegranate_rep_c27755	AG	41	6	6
pomegranate_rep_c27823	AG	79	10	5
pomegranate_rep_c27843	AG	1	16	8
pomegranate_rep_c28014	AG	1097	15	7
pomegranate_rep_c2808	AG	2376	17	8
pomegranate_rep_c28184	AG	1399	12	6
pomegranate_rep_c28293	AG	63	12	6
pomegranate_rep_c28348	AG	310	7	3
pomegranate_rep_c28451	AG	59	8	4
pomegranate_rep_c2854	AG	2080	7	3
pomegranate_rep_c28560	AG	177	9	4
pomegranate_rep_c28588	AG	74	18	9
pomegranate_rep_c28626	AG	293	9	4
pomegranate_rep_c28677	AG	7	20	10
pomegranate_rep_c28740	AG	401	7	3
pomegranate_rep_c28788	AG	231	11	7
pomegranate_rep_c28849	AG	463	13	6
pomegranate_rep_c29206	AG	474	6	5
pomegranate_rep_c29209	AG	1953	12	6
pomegranate_rep_c29284	AG	573	14	7
pomegranate_rep_c2937	AG	1125	15	7
pomegranate_rep_c2939	AG	73	10	5
pomegranate_rep_c29444	AG	1	12	6
pomegranate_rep_c29755	AG	603	13	6
pomegranate_rep_c29987	AG	902	21	10
pomegranate_rep_c3003	AG	185	7	7
pomegranate_rep_c30059	AG	796	11	5
pomegranate_rep_c30179	AG	517	8	4
pomegranate_rep_c30236	AG	320	11	5
pomegranate_rep_c30290	AG	43	12	6
pomegranate_rep_c30371	AG	1	8	4
pomegranate_rep_c30612	AG	1	15	7
pomegranate_rep_c30729	AG	1146	8	4
pomegranate_rep_c30743	AG	807	10	16
pomegranate_rep_c3078	AG	1807	19	9
pomegranate_rep_c30866	AG	488	15	7
pomegranate_rep_c30879	AG	240	17	8
pomegranate_rep_c3090	AG	1448	15	7
pomegranate_rep_c30948	AG	76	15	7
pomegranate_rep_c30984	AG	22	12	6
pomegranate_rep_c3104	AG	43	9	4
pomegranate_rep_c31056	AG	546	12	6
pomegranate_rep_c31098	AG	462	9	4
pomegranate_rep_c311	AG	47	10	5
pomegranate_rep_c31102	AG	78	8	6
pomegranate_rep_c3115	AG	2285	15	7
pomegranate_rep_c31433	AG	81	11	7
pomegranate_rep_c31505	AG	412	10	6
pomegranate_rep_c31507	AG	131	16	8
pomegranate_rep_c31531	AG	470	18	9
pomegranate_rep_c3158	AG	1649	12	6
pomegranate_rep_c31606	AG	404	10	8
pomegranate_rep_c31649	AG	191	22	12
pomegranate_rep_c31736	AG	1	19	9
pomegranate_rep_c31779	AG	49	12	6
pomegranate_rep_c320	AG	839	16	8
pomegranate_rep_c3201	AG	1	9	4
pomegranate_rep_c3205	AG	2120	6	5
pomegranate_rep_c32151	AG	755	12	6
pomegranate_rep_c32184	AG	636	12	6
pomegranate_rep_c32381	AG	147	17	8
pomegranate_rep_c32410	AG	44	7	6
pomegranate_rep_c32511	AG	32	12	6
pomegranate_rep_c32521	AG	515	8	4
pomegranate_rep_c3264	AG	1151	11	5
pomegranate_rep_c3269	AG	1382	10	5
pomegranate_rep_c32800	AG	28	13	6
pomegranate_rep_c32816	AG	61	10	5
pomegranate_rep_c32919	AG	464	20	10
pomegranate_rep_c3297	AG	1969	12	6
pomegranate_rep_c33020	AG	186	15	7
pomegranate_rep_c33068	AG	457	10	5
pomegranate_rep_c33166	AG	49	7	3
pomegranate_rep_c33238	AG	528	11	5
pomegranate_rep_c3329	AG	1	7	14
pomegranate_rep_c33336	AG	1046	19	9
pomegranate_rep_c33438	AG	252	9	4
pomegranate_rep_c33498	AG	32	10	5
pomegranate_rep_c33528	AG	293	12	8
pomegranate_rep_c337	AG	1698	9	4
pomegranate_rep_c3370	AG	1015	8	4
pomegranate_rep_c33722	AG	1106	9	4
pomegranate_rep_c33738	AG	722	11	5
pomegranate_rep_c33739	AG	883	9	4
pomegranate_rep_c3382	AG	1735	11	5
pomegranate_rep_c3383	AG	3050	14	7
pomegranate_rep_c34017	AG	21	21	10
pomegranate_rep_c34035	AG	508	11	5
pomegranate_rep_c3406	AG	1930	15	7
pomegranate_rep_c34125	AG	561	11	5
pomegranate_rep_c34249	AG	88	12	6
pomegranate_rep_c34329	AG	57	9	4
pomegranate_rep_c34444	AG	8	20	10
pomegranate_rep_c34496	AG	732	7	7
pomegranate_rep_c3454	AG	240	9	4
pomegranate_rep_c34555	AG	444	16	8
pomegranate_rep_c34726	AG	59	15	7
pomegranate_rep_c34851	AG	93	10	5
pomegranate_rep_c34908	AG	317	7	3
pomegranate_rep_c34917	AG	491	8	4
pomegranate_rep_c351	AG	668	14	7
pomegranate_rep_c35567	AG	25	10	5
pomegranate_rep_c35576	AG	610	12	6
pomegranate_rep_c35868	AG	692	10	5
pomegranate_rep_c35999	AG	283	8	4
pomegranate_rep_c36170	AG	779	9	14
pomegranate_rep_c36334	AG	550	11	5
pomegranate_rep_c36416	AG	1296	12	6
pomegranate_rep_c36457	AG	553	7	5
pomegranate_rep_c36534	AG	1076	9	4
pomegranate_rep_c36709	AG	52	9	4
pomegranate_rep_c36954	AG	423	9	4
pomegranate_rep_c37032	AG	558	11	5
pomegranate_rep_c37032	AG	700	9	4
pomegranate_rep_c37113	AG	363	13	6
pomegranate_rep_c3721	AG	1237	9	7
pomegranate_rep_c37338	AG	69	7	6
pomegranate_rep_c37379	AG	23	9	4
pomegranate_rep_c37382	AG	60	10	5
pomegranate_rep_c3743	AG	22	9	4
pomegranate_rep_c37547	AG	853	14	7
pomegranate_rep_c37556	AG	95	6	9
pomegranate_rep_c3760	AG	2787	10	5
pomegranate_rep_c37756	AG	573	16	8
pomegranate_rep_c3778	AG	786	9	7
pomegranate_rep_c37980	AG	409	12	6
pomegranate_rep_c38069	AG	181	7	3
pomegranate_rep_c38252	AG	146	15	7
pomegranate_rep_c3828	AG	1476	9	4
pomegranate_rep_c38351	AG	815	10	8
pomegranate_rep_c38454	AG	19	9	4
pomegranate_rep_c3846	AG	552	9	4
pomegranate_rep_c3875	AG	3100	7	3
pomegranate_rep_c38799	AG	913	8	4
pomegranate_rep_c38849	AG	56	9	4
pomegranate_rep_c3891	AG	193	10	7
pomegranate_rep_c38957	AG	158	11	5
pomegranate_rep_c39024	AG	25	12	6
pomegranate_rep_c39231	AG	759	8	4
pomegranate_rep_c39413	AG	339	15	7
pomegranate_rep_c39462	AG	199	19	9
pomegranate_rep_c3959	AG	53	9	4
pomegranate_rep_c3967	AG	1645	11	5
pomegranate_rep_c39715	AG	221	9	4
pomegranate_rep_c3978	AG	2091	10	5
pomegranate_rep_c3999	AG	1991	8	4
pomegranate_rep_c40093	AG	183	11	5
pomegranate_rep_c4025	AG	1420	16	8
pomegranate_rep_c4042	AG	1508	10	5
pomegranate_rep_c40488	AG	995	9	4
pomegranate_rep_c40515	AG	111	16	8
pomegranate_rep_c40600	AG	107	9	4
pomegranate_rep_c40610	AG	121	7	3
pomegranate_rep_c4072	AG	19	15	7
pomegranate_rep_c40854	AG	415	9	4
pomegranate_rep_c4124	AG	624	14	7
pomegranate_rep_c41320	AG	243	14	7
pomegranate_rep_c41338	AG	664	15	7
pomegranate_rep_c4148	AG	919	16	8
pomegranate_rep_c41494	AG	42	18	9
pomegranate_rep_c41525	AG	714	12	6
pomegranate_rep_c41648	AG	143	9	4
pomegranate_rep_c4178	AG	1669	15	7
pomegranate_rep_c4182	AG	60	8	4
pomegranate_rep_c41822	AG	80	11	5
pomegranate_rep_c41852	AG	64	21	10
pomegranate_rep_c41860	AG	247	8	4
pomegranate_rep_c41933	AG	222	10	5
pomegranate_rep_c41933	AG	994	9	4
pomegranate_rep_c42137	AG	400	8	4
pomegranate_rep_c42177	AG	8	10	5
pomegranate_rep_c4218	AG	1525	15	7
pomegranate_rep_c42303	AG	42	12	6
pomegranate_rep_c42315	AG	82	13	9
pomegranate_rep_c42345	AG	674	14	7
pomegranate_rep_c42460	AG	271	11	5
pomegranate_rep_c42724	AG	215	9	4
pomegranate_rep_c42818	AG	75	12	6
pomegranate_rep_c42853	AG	815	13	6
pomegranate_rep_c4292	AG	163	9	4
pomegranate_rep_c4299	AG	2288	10	5
pomegranate_rep_c4299	AG	2426	14	7
pomegranate_rep_c43016	AG	183	15	7
pomegranate_rep_c43029	AG	579	16	8
pomegranate_rep_c4305	AG	728	14	7
pomegranate_rep_c4323	AG	2245	11	5
pomegranate_rep_c43232	AG	41	11	5
pomegranate_rep_c43437	AG	105	9	4
pomegranate_rep_c43448	AG	353	13	6
pomegranate_rep_c43591	AG	42	19	9
pomegranate_rep_c4360	AG	1453	13	6
pomegranate_rep_c4365	AG	1897	16	8
pomegranate_rep_c43818	AG	375	9	4
pomegranate_rep_c43895	AG	820	11	5
pomegranate_rep_c43935	AG	447	7	3
pomegranate_rep_c43969	AG	16	17	8
pomegranate_rep_c44118	AG	525	11	5
pomegranate_rep_c44248	AG	515	14	7
pomegranate_rep_c44299	AG	458	10	5
pomegranate_rep_c44434	AG	512	13	6
pomegranate_rep_c44531	AG	540	13	6
pomegranate_rep_c44955	AG	70	8	4
pomegranate_rep_c45070	AG	822	16	8
pomegranate_rep_c4545	AG	1919	9	4
pomegranate_rep_c45455	AG	71	9	4
pomegranate_rep_c4546	AG	553	9	4
pomegranate_rep_c4558	AG	3786	10	5
pomegranate_rep_c45701	AG	589	9	4
pomegranate_rep_c458	AG	654	12	6
pomegranate_rep_c45896	AG	334	12	7
pomegranate_rep_c45972	AG	860	12	6
pomegranate_rep_c4614	AG	1646	10	5
pomegranate_rep_c46344	AG	546	14	7
pomegranate_rep_c46411	AG	220	15	7
pomegranate_rep_c46637	AG	411	13	6
pomegranate_rep_c46648	AG	1	15	7
pomegranate_rep_c46986	AG	15	14	7
pomegranate_rep_c47136	AG	755	8	7
pomegranate_rep_c47208	AG	649	15	7
pomegranate_rep_c47414	AG	63	16	8
pomegranate_rep_c47489	AG	537	14	7
pomegranate_rep_c4752	AG	732	10	5
pomegranate_rep_c47655	AG	1053	12	6
pomegranate_rep_c47919	AG	616	16	8
pomegranate_rep_c4807	AG	2184	14	7
pomegranate_rep_c48395	AG	1	11	5
pomegranate_rep_c48401	AG	287	13	6
pomegranate_rep_c4848	AG	81	9	4
pomegranate_rep_c4881	AG	751	8	4
pomegranate_rep_c4890	AG	2160	13	6
pomegranate_rep_c4892	AG	2151	13	6
pomegranate_rep_c48993	AG	243	18	9
pomegranate_rep_c49073	AG	649	14	7
pomegranate_rep_c49235	AG	174	10	5
pomegranate_rep_c49259	AG	431	9	4
pomegranate_rep_c4931	AG	740	13	6
pomegranate_rep_c49368	AG	469	8	4
pomegranate_rep_c49449	AG	14	7	3
pomegranate_rep_c4949	AG	1268	12	6
pomegranate_rep_c4955	AG	1177	12	6
pomegranate_rep_c49708	AG	511	18	9
pomegranate_rep_c49909	AG	47	16	8
pomegranate_rep_c5018	AG	722	14	7
pomegranate_rep_c50193	AG	397	8	4
pomegranate_rep_c5025	AG	856	10	5
pomegranate_rep_c50358	AG	641	6	6
pomegranate_rep_c5044	AG	509	10	5
pomegranate_rep_c50496	AG	441	11	5
pomegranate_rep_c50579	AG	7	7	3
pomegranate_rep_c5060	AG	2609	12	6
pomegranate_rep_c50687	AG	719	6	8
pomegranate_rep_c50736	AG	267	13	6
pomegranate_rep_c50749	AG	15	9	4
pomegranate_rep_c50805	AG	135	15	6
pomegranate_rep_c50860	AG	280	14	7
pomegranate_rep_c509	AG	3645	9	4
pomegranate_rep_c50906	AG	84	11	5
pomegranate_rep_c5103	AG	1	19	9
pomegranate_rep_c51071	AG	187	11	5
pomegranate_rep_c51135	AG	95	15	7
pomegranate_rep_c5118	AG	1330	12	6
pomegranate_rep_c5119	AG	1803	11	5
pomegranate_rep_c51239	AG	89	8	4
pomegranate_rep_c51333	AG	62	10	5
pomegranate_rep_c51560	AG	270	10	5
pomegranate_rep_c51638	AG	221	9	4
pomegranate_rep_c51715	AG	150	7	3
pomegranate_rep_c51782	AG	184	9	4
pomegranate_rep_c5179	AG	191	8	4
pomegranate_rep_c51808	AG	157	9	4
pomegranate_rep_c51878	AG	613	10	5
pomegranate_rep_c5248	AG	1	12	6
pomegranate_rep_c52584	AG	238	8	4
pomegranate_rep_c52627	AG	422	12	6
pomegranate_rep_c52662	AG	107	16	8
pomegranate_rep_c52724	AG	580	14	9
pomegranate_rep_c5283	AG	88	11	5
pomegranate_rep_c52851	AG	97	9	4
pomegranate_rep_c5289	AG	207	9	4
pomegranate_rep_c52899	AG	48	19	9
pomegranate_rep_c53594	AG	669	11	5
pomegranate_rep_c5373	AG	1358	9	4
pomegranate_rep_c53826	AG	31	11	5
pomegranate_rep_c53833	AG	92	10	5
pomegranate_rep_c53911	AG	367	10	5
pomegranate_rep_c53960	AG	397	11	5
pomegranate_rep_c54123	AG	24	13	6
pomegranate_rep_c54185	AG	17	9	4
pomegranate_rep_c54200	AG	357	13	6
pomegranate_rep_c54399	AG	175	13	6
pomegranate_rep_c54465	AG	249	8	6
pomegranate_rep_c54475	AG	66	22	11
pomegranate_rep_c54497	AG	267	9	4
pomegranate_rep_c5450	AG	1393	13	6
pomegranate_rep_c54512	AG	26	7	3
pomegranate_rep_c54846	AG	172	12	6
pomegranate_rep_c5504	AG	2415	14	7
pomegranate_rep_c55356	AG	39	10	5
pomegranate_rep_c55411	AG	278	11	5
pomegranate_rep_c55453	AG	433	8	4
pomegranate_rep_c5546	AG	59	12	6
pomegranate_rep_c55498	AG	54	14	7
pomegranate_rep_c556	AG	1415	14	7
pomegranate_rep_c55734	AG	166	16	8
pomegranate_rep_c55874	AG	28	11	5
pomegranate_rep_c55890	AG	384	7	3
pomegranate_rep_c55897	AG	521	10	5
pomegranate_rep_c55898	AG	67	10	10
pomegranate_rep_c56026	AG	630	9	4
pomegranate_rep_c56109	AG	16	18	9
pomegranate_rep_c5619	AG	56	18	9
pomegranate_rep_c5623	AG	2030	16	8
pomegranate_rep_c56237	AG	719	13	6
pomegranate_rep_c56252	AG	234	17	8
pomegranate_rep_c56294	AG	276	8	4
pomegranate_rep_c5633	AG	1017	9	4
pomegranate_rep_c56412	AG	25	11	5
pomegranate_rep_c56432	AG	129	10	5
pomegranate_rep_c56432	AG	515	23	15
pomegranate_rep_c56488	AG	675	8	7
pomegranate_rep_c56511	AG	264	16	8
pomegranate_rep_c56570	AG	271	9	4
pomegranate_rep_c56634	AG	310	13	6
pomegranate_rep_c56648	AG	147	19	9
pomegranate_rep_c56680	AG	24	18	9
pomegranate_rep_c56995	AG	36	16	8
pomegranate_rep_c57028	AG	7	7	3
pomegranate_rep_c57199	AG	144	10	7
pomegranate_rep_c57242	AG	109	14	7
pomegranate_rep_c57441	AG	1	11	5
pomegranate_rep_c57513	AG	71	11	5
pomegranate_rep_c57719	AG	432	14	7
pomegranate_rep_c57765	AG	496	7	3
pomegranate_rep_c57908	AG	23	8	7
pomegranate_rep_c57964	AG	572	7	3
pomegranate_rep_c58153	AG	25	6	5
pomegranate_rep_c5822	AG	1862	9	4
pomegranate_rep_c58294	AG	141	28	14
pomegranate_rep_c58680	AG	247	17	8
pomegranate_rep_c58738	AG	167	11	5
pomegranate_rep_c58789	AG	95	10	6
pomegranate_rep_c58826	AG	45	18	9
pomegranate_rep_c58934	AG	230	14	7
pomegranate_rep_c5897	AG	1180	15	21
pomegranate_rep_c59028	AG	392	11	5
pomegranate_rep_c59067	AG	28	12	6
pomegranate_rep_c5924	AG	130	11	11
pomegranate_rep_c593	AG	846	9	4
pomegranate_rep_c59372	AG	30	15	7
pomegranate_rep_c59537	AG	395	13	6
pomegranate_rep_c59592	AG	173	9	4
pomegranate_rep_c596	AG	800	9	4
pomegranate_rep_c59642	AG	480	15	7
pomegranate_rep_c59713	AG	44	13	6
pomegranate_rep_c59759	AG	99	13	6
pomegranate_rep_c59794	AG	262	21	10
pomegranate_rep_c60053	AG	112	8	4
pomegranate_rep_c60102	AG	89	16	8
pomegranate_rep_c6033	AG	3	11	5
pomegranate_rep_c60544	AG	309	7	3
pomegranate_rep_c60630	AG	440	11	5
pomegranate_rep_c60678	AG	54	8	5
pomegranate_rep_c60686	AG	431	14	7
pomegranate_rep_c60695	AG	78	10	5
pomegranate_rep_c60807	AG	137	9	4
pomegranate_rep_c60895	AG	7	18	9
pomegranate_rep_c6094	AG	580	9	4
pomegranate_rep_c60972	AG	62	8	9
pomegranate_rep_c60982	AG	15	11	5
pomegranate_rep_c61045	AG	122	10	5
pomegranate_rep_c61055	AG	1	14	7
pomegranate_rep_c61113	AG	68	13	6
pomegranate_rep_c61114	AG	27	17	8
pomegranate_rep_c6112	AG	48	7	3
pomegranate_rep_c61266	AG	49	15	7
pomegranate_rep_c6128	AG	754	7	3
pomegranate_rep_c61283	AG	204	17	8
pomegranate_rep_c61306	AG	50	10	5
pomegranate_rep_c61340	AG	21	18	9
pomegranate_rep_c61756	AG	74	17	8
pomegranate_rep_c61796	AG	129	23	11
pomegranate_rep_c6180	AG	2589	9	4
pomegranate_rep_c61809	AG	5	10	5
pomegranate_rep_c61935	AG	15	10	5
pomegranate_rep_c61937	AG	31	13	6
pomegranate_rep_c61997	AG	3	8	6
pomegranate_rep_c62005	AG	680	9	6
pomegranate_rep_c62029	AG	29	17	8
pomegranate_rep_c62096	AG	17	16	8
pomegranate_rep_c623	AG	53	9	4
pomegranate_rep_c62351	AG	72	13	6
pomegranate_rep_c6251	AG	168	9	4
pomegranate_rep_c6254	AG	1935	14	7
pomegranate_rep_c62620	AG	59	10	5
pomegranate_rep_c62641	AG	14	18	9
pomegranate_rep_c6282	AG	1206	13	6
pomegranate_rep_c62890	AG	71	10	6
pomegranate_rep_c62987	AG	99	9	4
pomegranate_rep_c6304	AG	1420	16	8
pomegranate_rep_c63116	AG	16	16	8
pomegranate_rep_c63170	AG	24	20	10
pomegranate_rep_c63221	AG	54	10	11
pomegranate_rep_c63261	AG	48	10	5
pomegranate_rep_c63401	AG	520	7	3
pomegranate_rep_c63427	AG	785	9	4
pomegranate_rep_c63441	AG	90	15	7
pomegranate_rep_c63522	AG	16	12	8
pomegranate_rep_c63576	AG	84	13	6
pomegranate_rep_c636	AG	23	11	5
pomegranate_rep_c63722	AG	28	17	8
pomegranate_rep_c63725	AG	612	11	5
pomegranate_rep_c63880	AG	787	16	8
pomegranate_rep_c64012	AG	26	21	10
pomegranate_rep_c64063	AG	17	9	4
pomegranate_rep_c64099	AG	1	28	14
pomegranate_rep_c64111	AG	633	12	6
pomegranate_rep_c64206	AG	20	20	10
pomegranate_rep_c64216	AG	51	18	9
pomegranate_rep_c6425	AG	12	8	4
pomegranate_rep_c64324	AG	26	17	8
pomegranate_rep_c6440	AG	590	12	6
pomegranate_rep_c64496	AG	44	9	4
pomegranate_rep_c64547	AG	17	14	7
pomegranate_rep_c64590	AG	20	7	3
pomegranate_rep_c64724	AG	703	11	5
pomegranate_rep_c6474	AG	1247	13	6
pomegranate_rep_c64791	AG	166	10	5
pomegranate_rep_c64837	AG	23	11	5
pomegranate_rep_c64891	AG	437	7	3
pomegranate_rep_c6495	AG	58	8	4
pomegranate_rep_c6500	AG	1032	14	7
pomegranate_rep_c6509	AG	1146	11	5
pomegranate_rep_c65173	AG	12	14	9
pomegranate_rep_c65206	AG	33	9	4
pomegranate_rep_c65215	AG	46	12	6
pomegranate_rep_c6549	AG	9	12	6
pomegranate_rep_c65630	AG	505	14	7
pomegranate_rep_c65690	AG	1	9	13
pomegranate_rep_c65749	AG	391	11	5
pomegranate_rep_c6583	AG	913	12	6
pomegranate_rep_c6585	AG	1264	14	7
pomegranate_rep_c65863	AG	22	8	4
pomegranate_rep_c65901	AG	20	16	8
pomegranate_rep_c65912	AG	4	15	9
pomegranate_rep_c65971	AG	33	11	5
pomegranate_rep_c66068	AG	288	10	5
pomegranate_rep_c66160	AG	50	12	6
pomegranate_rep_c6628	AG	2026	20	10
pomegranate_rep_c666	AG	808	12	6
pomegranate_rep_c6668	AG	8	12	7
pomegranate_rep_c6694	AG	902	10	5
pomegranate_rep_c6705	AG	115	12	8
pomegranate_rep_c67080	AG	16	9	4
pomegranate_rep_c67088	AG	797	17	8
pomegranate_rep_c6714	AG	117	10	5
pomegranate_rep_c6714	AG	317	13	6
pomegranate_rep_c6732	AG	668	7	3
pomegranate_rep_c6795	AG	1456	12	6
pomegranate_rep_c67996	AG	440	10	5
pomegranate_rep_c689	AG	70	7	6
pomegranate_rep_c6905	AG	2924	11	5
pomegranate_rep_c6928	AG	1206	11	5
pomegranate_rep_c696	AG	1683	11	5
pomegranate_rep_c6965	AG	1710	11	5
pomegranate_rep_c6976	AG	1008	10	5
pomegranate_rep_c6984	AG	852	10	5
pomegranate_rep_c7030	AG	18	11	5
pomegranate_rep_c7034	AG	73	13	6
pomegranate_rep_c7090	AG	1769	8	4
pomegranate_rep_c7198	AG	1099	16	8
pomegranate_rep_c72	AG	851	8	4
pomegranate_rep_c7283	AG	488	14	7
pomegranate_rep_c7367	AG	46	10	6
pomegranate_rep_c7399	AG	1020	9	4
pomegranate_rep_c7417	AG	1292	9	9
pomegranate_rep_c7622	AG	762	8	10
pomegranate_rep_c7636	AG	999	11	5
pomegranate_rep_c7643	AG	949	7	3
pomegranate_rep_c7727	AG	1535	12	6
pomegranate_rep_c775	AG	1217	10	5
pomegranate_rep_c776	AG	1780	11	5
pomegranate_rep_c7784	AG	2246	15	7
pomegranate_rep_c7921	AG	15	9	4
pomegranate_rep_c7927	AG	88	8	4
pomegranate_rep_c798	AG	536	17	8
pomegranate_rep_c8062	AG	1	15	7
pomegranate_rep_c8187	AG	1	17	8
pomegranate_rep_c8259	AG	1027	17	8
pomegranate_rep_c8265	AG	1798	18	9
pomegranate_rep_c8293	AG	561	8	4
pomegranate_rep_c8430	AG	1366	12	6
pomegranate_rep_c8457	AG	17	13	6
pomegranate_rep_c8516	AG	81	12	6
pomegranate_rep_c8526	AG	1431	15	7
pomegranate_rep_c8602	AG	52	6	5
pomegranate_rep_c8647	AG	35	6	6
pomegranate_rep_c8656	AG	71	9	4
pomegranate_rep_c8682	AG	1	9	7
pomegranate_rep_c8701	AG	1603	17	8
pomegranate_rep_c8718	AG	665	11	8
pomegranate_rep_c8740	AG	26	11	5
pomegranate_rep_c8758	AG	520	10	5
pomegranate_rep_c8804	AG	2027	13	6
pomegranate_rep_c8805	AG	1232	10	5
pomegranate_rep_c8807	AG	3	15	7
pomegranate_rep_c8819	AG	1379	7	3
pomegranate_rep_c8820	AG	2744	8	4
pomegranate_rep_c8878	AG	38	12	9
pomegranate_rep_c9006	AG	1916	10	5
pomegranate_rep_c9007	AG	242	13	6
pomegranate_rep_c9029	AG	1193	7	3
pomegranate_rep_c908	AG	732	10	8
pomegranate_rep_c9127	AG	2264	8	4
pomegranate_rep_c9221	AG	757	11	5
pomegranate_rep_c9264	AG	1129	8	4
pomegranate_rep_c9333	AG	1312	9	4
pomegranate_rep_c9350	AG	646	18	9
pomegranate_rep_c9360	AG	80	10	6
pomegranate_rep_c9400	AG	2271	12	6
pomegranate_rep_c9407	AG	1035	16	8
pomegranate_rep_c9414	AG	252	10	5
pomegranate_rep_c9433	AG	1599	19	9
pomegranate_rep_c9609	AG	848	9	4
pomegranate_rep_c9628	AG	1049	22	11
pomegranate_rep_c9791	AG	35	7	3
pomegranate_rep_c9834	AG	187	10	5
pomegranate_rep_c9839	AG	29	7	3
pomegranate_rep_c9850	AG	80	9	4
pomegranate_rep_c9977	AG	548	9	4
pomegranate_rep_c9993	AG	3066	9	4
pomegranate_rep_c9997	AG	731	13	6
pomegranate_c10205	AGA	454	7	4
pomegranate_c10955	AGA	1308	6	3
pomegranate_c13926	AGA	162	21	12
pomegranate_c15357	AGA	1551	6	3
pomegranate_c18254	AGA	500	5	3
pomegranate_c23136	AGA	1487	6	3
pomegranate_c25019	AGA	1088	8	4
pomegranate_c25225	AGA	67	9	5
pomegranate_c26202	AGA	1134	10	6
pomegranate_c38526	AGA	423	6	3
pomegranate_c52037	AGA	321	5	3
pomegranate_c54326	AGA	327	6	3
pomegranate_c57963	AGA	626	8	4
pomegranate_c58505	AGA	1	5	3
pomegranate_rep_c10135	AGA	51	5	3
pomegranate_rep_c10315	AGA	201	5	3
pomegranate_rep_c10847	AGA	1134	8	4
pomegranate_rep_c1125	AGA	2280	8	4
pomegranate_rep_c11301	AGA	40	9	5
pomegranate_rep_c12607	AGA	112	5	3
pomegranate_rep_c12860	AGA	48	5	3
pomegranate_rep_c12925	AGA	562	5	3
pomegranate_rep_c14894	AGA	35	5	3
pomegranate_rep_c15624	AGA	46	7	4
pomegranate_rep_c16274	AGA	1286	7	4
pomegranate_rep_c1674	AGA	1685	5	3
pomegranate_rep_c16851	AGA	1015	5	3
pomegranate_rep_c17143	AGA	664	6	3
pomegranate_rep_c18027	AGA	79	6	3
pomegranate_rep_c18301	AGA	1207	8	4
pomegranate_rep_c18309	AGA	63	5	3
pomegranate_rep_c18802	AGA	693	7	4
pomegranate_rep_c1891	AGA	85	6	3
pomegranate_rep_c19579	AGA	487	6	3
pomegranate_rep_c1974	AGA	41	6	3
pomegranate_rep_c20059	AGA	31	5	3
pomegranate_rep_c20156	AGA	798	7	4
pomegranate_rep_c21115	AGA	488	8	5
pomegranate_rep_c21241	AGA	864	5	3
pomegranate_rep_c21360	AGA	294	7	4
pomegranate_rep_c21605	AGA	192	6	3
pomegranate_rep_c2191	AGA	1994	5	3
pomegranate_rep_c22109	AGA	96	6	3
pomegranate_rep_c22636	AGA	1204	9	7
pomegranate_rep_c23325	AGA	90	7	4
pomegranate_rep_c23546	AGA	602	5	4
pomegranate_rep_c24699	AGA	317	10	6
pomegranate_rep_c25505	AGA	35	5	3
pomegranate_rep_c25880	AGA	568	8	5
pomegranate_rep_c2656	AGA	143	6	3
pomegranate_rep_c26636	AGA	108	6	4
pomegranate_rep_c26668	AGA	447	6	3
pomegranate_rep_c269	AGA	1299	9	5
pomegranate_rep_c2707	AGA	86	5	3
pomegranate_rep_c27589	AGA	35	5	3
pomegranate_rep_c28480	AGA	339	6	3
pomegranate_rep_c28542	AGA	576	5	4
pomegranate_rep_c29254	AGA	91	7	4
pomegranate_rep_c29628	AGA	67	7	4
pomegranate_rep_c3007	AGA	4392	5	3
pomegranate_rep_c31134	AGA	905	6	5
pomegranate_rep_c31173	AGA	56	7	6
pomegranate_rep_c31294	AGA	37	7	4
pomegranate_rep_c31840	AGA	271	8	5
pomegranate_rep_c31942	AGA	695	8	4
pomegranate_rep_c32094	AGA	125	6	5
pomegranate_rep_c324	AGA	689	5	3
pomegranate_rep_c32955	AGA	1069	5	3
pomegranate_rep_c3427	AGA	101	6	3
pomegranate_rep_c34391	AGA	75	8	4
pomegranate_rep_c34551	AGA	896	5	3
pomegranate_rep_c35034	AGA	35	5	3
pomegranate_rep_c3557	AGA	259	7	4
pomegranate_rep_c35635	AGA	13	9	5
pomegranate_rep_c35952	AGA	478	6	3
pomegranate_rep_c361	AGA	72	5	4
pomegranate_rep_c36418	AGA	215	9	5
pomegranate_rep_c37141	AGA	679	5	3
pomegranate_rep_c37765	AGA	31	5	3
pomegranate_rep_c3791	AGA	75	9	5
pomegranate_rep_c3962	AGA	1571	11	6
pomegranate_rep_c40059	AGA	25	7	4
pomegranate_rep_c4028	AGA	742	5	3
pomegranate_rep_c41498	AGA	182	6	4
pomegranate_rep_c43695	AGA	70	9	5
pomegranate_rep_c4472	AGA	1240	5	3
pomegranate_rep_c45029	AGA	322	5	3
pomegranate_rep_c4529	AGA	1673	7	7
pomegranate_rep_c46532	AGA	500	8	4
pomegranate_rep_c4666	AGA	1753	5	4
pomegranate_rep_c46694	AGA	308	5	3
pomegranate_rep_c47248	AGA	75	5	3
pomegranate_rep_c5086	AGA	31	5	3
pomegranate_rep_c52312	AGA	79	9	5
pomegranate_rep_c529	AGA	57	5	3
pomegranate_rep_c53176	AGA	31	9	5
pomegranate_rep_c53444	AGA	139	5	3
pomegranate_rep_c54162	AGA	139	6	3
pomegranate_rep_c55868	AGA	35	5	3
pomegranate_rep_c5602	AGA	1383	8	5
pomegranate_rep_c56384	AGA	566	7	4
pomegranate_rep_c57833	AGA	469	5	3
pomegranate_rep_c5791	AGA	747	5	3
pomegranate_rep_c58879	AGA	656	5	3
pomegranate_rep_c5893	AGA	54	8	4
pomegranate_rep_c58944	AGA	22	6	3
pomegranate_rep_c5921	AGA	274	5	3
pomegranate_rep_c5953	AGA	85	10	6
pomegranate_rep_c59634	AGA	755	8	4
pomegranate_rep_c60024	AGA	155	8	5
pomegranate_rep_c61181	AGA	582	7	5
pomegranate_rep_c6232	AGA	1586	6	3
pomegranate_rep_c64278	AGA	474	5	3
pomegranate_rep_c64509	AGA	52	5	3
pomegranate_rep_c65280	AGA	175	6	3
pomegranate_rep_c6616	AGA	138	5	3
pomegranate_rep_c6659	AGA	1132	7	4
pomegranate_rep_c6735	AGA	64	8	5
pomegranate_rep_c7016	AGA	67	5	3
pomegranate_rep_c7186	AGA	353	6	4
pomegranate_rep_c75	AGA	71	5	3
pomegranate_rep_c7859	AGA	1351	5	3
pomegranate_rep_c8040	AGA	1044	5	3
pomegranate_rep_c8745	AGA	95	9	5
pomegranate_rep_c9389	AGA	1640	9	5
pomegranate_c37743	AGAA	599	7	4
pomegranate_rep_c14317	AGAA	1	5	3
pomegranate_rep_c2214	AGAA	1838	7	7
pomegranate_rep_c23249	AGAAGG	381	6	5
pomegranate_rep_c9163	AGACC	179	5	3
pomegranate_c13566	AGC	854	7	4
pomegranate_c14160	AGC	679	5	3
pomegranate_c38076	AGC	531	7	4
pomegranate_c39975	AGC	779	5	3
pomegranate_c9689	AGC	1437	5	3
pomegranate_rep_c1011	AGC	1276	5	3
pomegranate_rep_c1055	AGC	278	5	3
pomegranate_rep_c11465	AGC	1638	5	5
pomegranate_rep_c11568	AGC	457	7	4
pomegranate_rep_c11973	AGC	727	5	3
pomegranate_rep_c12506	AGC	1819	5	3
pomegranate_rep_c1262	AGC	277	5	3
pomegranate_rep_c13050	AGC	862	5	3
pomegranate_rep_c14796	AGC	679	5	3
pomegranate_rep_c15685	AGC	432	6	3
pomegranate_rep_c15994	AGC	1605	6	3
pomegranate_rep_c1622	AGC	211	5	3
pomegranate_rep_c16392	AGC	386	8	5
pomegranate_rep_c1755	AGC	539	5	4
pomegranate_rep_c18166	AGC	783	7	4
pomegranate_rep_c19140	AGC	131	5	3
pomegranate_rep_c1970	AGC	115	5	3
pomegranate_rep_c20242	AGC	583	6	3
pomegranate_rep_c21058	AGC	249	6	3
pomegranate_rep_c21401	AGC	6	5	3
pomegranate_rep_c21418	AGC	1760	5	3
pomegranate_rep_c21454	AGC	518	5	12
pomegranate_rep_c21526	AGC	755	5	5
pomegranate_rep_c22409	AGC	32	8	5
pomegranate_rep_c23036	AGC	515	5	3
pomegranate_rep_c23562	AGC	174	5	3
pomegranate_rep_c24034	AGC	675	5	3
pomegranate_rep_c24200	AGC	477	6	4
pomegranate_rep_c2607	AGC	237	7	4
pomegranate_rep_c26785	AGC	153	5	3
pomegranate_rep_c26952	AGC	398	5	4
pomegranate_rep_c27411	AGC	180	5	3
pomegranate_rep_c27465	AGC	80	5	3
pomegranate_rep_c27808	AGC	23	8	5
pomegranate_rep_c29710	AGC	658	5	3
pomegranate_rep_c29830	AGC	182	5	3
pomegranate_rep_c30333	AGC	219	6	3
pomegranate_rep_c31222	AGC	47	5	3
pomegranate_rep_c31495	AGC	23	5	3
pomegranate_rep_c31875	AGC	688	5	3
pomegranate_rep_c32475	AGC	695	6	4
pomegranate_rep_c33898	AGC	743	5	3
pomegranate_rep_c36992	AGC	76	7	4
pomegranate_rep_c38516	AGC	124	5	3
pomegranate_rep_c39920	AGC	94	7	4
pomegranate_rep_c4209	AGC	1750	5	3
pomegranate_rep_c42730	AGC	203	6	5
pomegranate_rep_c46308	AGC	205	5	5
pomegranate_rep_c47757	AGC	90	5	3
pomegranate_rep_c480	AGC	546	5	3
pomegranate_rep_c49157	AGC	266	5	3
pomegranate_rep_c49788	AGC	83	5	3
pomegranate_rep_c50527	AGC	715	6	3
pomegranate_rep_c51627	AGC	26	5	3
pomegranate_rep_c52266	AGC	8	5	6
pomegranate_rep_c5233	AGC	1076	5	3
pomegranate_rep_c53358	AGC	239	5	3
pomegranate_rep_c56575	AGC	379	5	3
pomegranate_rep_c58480	AGC	67	5	4
pomegranate_rep_c5867	AGC	763	9	5
pomegranate_rep_c58798	AGC	125	9	5
pomegranate_rep_c6399	AGC	39	7	4
pomegranate_rep_c65384	AGC	58	5	3
pomegranate_rep_c65950	AGC	777	7	4
pomegranate_rep_c66090	AGC	439	5	3
pomegranate_rep_c66244	AGC	817	7	4
pomegranate_rep_c6769	AGC	1293	5	3
pomegranate_rep_c7443	AGC	83	5	3
pomegranate_rep_c7607	AGC	2045	5	3
pomegranate_rep_c7746	AGC	1	6	3
pomegranate_rep_c8221	AGC	1133	5	3
pomegranate_rep_c8780	AGC	325	5	3
pomegranate_rep_c9269	AGC	1375	5	3
pomegranate_rep_c9541	AGC	542	6	3
pomegranate_rep_c9644	AGC	1225	6	4
pomegranate_rep_c9900	AGC	752	5	3
pomegranate_c17501	AGCA	212	5	3
pomegranate_rep_c25573	AGCAGA	855	5	3
pomegranate_rep_c1098	AGCC	1214	5	4
pomegranate_rep_c6484	AGCCCT	302	6	4
pomegranate_rep_c18329	AGCG	52	5	4
pomegranate_rep_c15674	AGCT	696	5	3
pomegranate_rep_c40894	AGCT	257	6	4
pomegranate_rep_c5316	AGCT	275	6	4
pomegranate_rep_c11780	AGCTA	128	6	4
pomegranate_c13089	AGG	1401	6	3
pomegranate_c21390	AGG	605	7	5
pomegranate_c21392	AGG	807	5	3
pomegranate_c21624	AGG	1422	6	3
pomegranate_c25159	AGG	686	5	3
pomegranate_c26362	AGG	652	6	4
pomegranate_c37814	AGG	240	7	4
pomegranate_c56346	AGG	480	5	3
pomegranate_c59190	AGG	237	5	3
pomegranate_c63396	AGG	111	5	3
pomegranate_rep_c10838	AGG	413	6	4
pomegranate_rep_c12067	AGG	307	9	5
pomegranate_rep_c13658	AGG	627	6	3
pomegranate_rep_c15900	AGG	743	5	4
pomegranate_rep_c17849	AGG	247	5	3
pomegranate_rep_c17967	AGG	1088	7	4
pomegranate_rep_c18067	AGG	351	5	3
pomegranate_rep_c19787	AGG	2055	5	3
pomegranate_rep_c20885	AGG	360	7	4
pomegranate_rep_c2095	AGG	205	5	3
pomegranate_rep_c21108	AGG	80	14	8
pomegranate_rep_c21449	AGG	49	7	4
pomegranate_rep_c21463	AGG	132	8	4
pomegranate_rep_c2203	AGG	1288	5	3
pomegranate_rep_c22434	AGG	56	5	3
pomegranate_rep_c2245	AGG	1203	5	3
pomegranate_rep_c2301	AGG	1060	5	3
pomegranate_rep_c23249	AGG	212	9	5
pomegranate_rep_c24530	AGG	525	5	3
pomegranate_rep_c25753	AGG	244	5	3
pomegranate_rep_c28272	AGG	1162	5	3
pomegranate_rep_c29440	AGG	56	6	5
pomegranate_rep_c29541	AGG	712	6	3
pomegranate_rep_c29830	AGG	428	5	4
pomegranate_rep_c30004	AGG	423	6	3
pomegranate_rep_c31433	AGG	204	6	4
pomegranate_rep_c32770	AGG	28	8	5
pomegranate_rep_c33180	AGG	5	6	3
pomegranate_rep_c33498	AGG	153	6	4
pomegranate_rep_c33711	AGG	681	5	3
pomegranate_rep_c34165	AGG	407	6	4
pomegranate_rep_c36953	AGG	161	10	6
pomegranate_rep_c38137	AGG	871	6	7
pomegranate_rep_c3846	AGG	139	11	6
pomegranate_rep_c38533	AGG	345	6	7
pomegranate_rep_c3924	AGG	2546	5	3
pomegranate_rep_c3997	AGG	1019	5	3
pomegranate_rep_c4114	AGG	257	7	4
pomegranate_rep_c43054	AGG	484	7	4
pomegranate_rep_c43543	AGG	237	5	3
pomegranate_rep_c45597	AGG	156	6	3
pomegranate_rep_c46804	AGG	374	10	6
pomegranate_rep_c49510	AGG	63	5	3
pomegranate_rep_c50690	AGG	201	5	3
pomegranate_rep_c5114	AGG	1186	6	4
pomegranate_rep_c51633	AGG	353	8	5
pomegranate_rep_c5273	AGG	99	9	5
pomegranate_rep_c5346	AGG	397	6	5
pomegranate_rep_c56153	AGG	320	5	3
pomegranate_rep_c5788	AGG	1773	5	3
pomegranate_rep_c5800	AGG	297	6	6
pomegranate_rep_c58745	AGG	8	8	5
pomegranate_rep_c6016	AGG	1037	9	5
pomegranate_rep_c61207	AGG	269	6	4
pomegranate_rep_c63748	AGG	27	9	5
pomegranate_rep_c63766	AGG	442	5	3
pomegranate_rep_c64882	AGG	39	6	5
pomegranate_rep_c6683	AGG	2322	8	5
pomegranate_rep_c6990	AGG	1443	5	3
pomegranate_rep_c8244	AGG	26	8	5
pomegranate_rep_c8572	AGG	2817	5	3
pomegranate_rep_c8823	AGG	141	5	3
pomegranate_rep_c9968	AGG	1586	10	6
pomegranate_rep_c1182	AGGA	2090	5	4
pomegranate_rep_c24075	AGGA	72	9	6
pomegranate_rep_c31923	AGGA	190	5	3
pomegranate_rep_c4832	AGGA	1381	6	4
pomegranate_c52733	AGGAG	23	5	3
pomegranate_rep_c57186	AGGAG	26	5	3
pomegranate_rep_c19007	AGGCAG	500	6	4
pomegranate_rep_c26910	AGGCTG	387	5	4
pomegranate_rep_c7007	AGGTCC	1	5	4
pomegranate_rep_c11898	AGTAC	51	5	3
pomegranate_c11503	AT	5	11	5
pomegranate_c14711	AT	726	9	4
pomegranate_c14814	AT	907	12	6
pomegranate_c16495	AT	4	10	5
pomegranate_c16565	AT	573	11	5
pomegranate_c17286	AT	87	10	5
pomegranate_c17452	AT	99	11	5
pomegranate_c21356	AT	27	9	4
pomegranate_c22350	AT	380	11	5
pomegranate_c25022	AT	762	9	4
pomegranate_c25646	AT	714	14	7
pomegranate_c26900	AT	91	9	4
pomegranate_c27152	AT	400	9	4
pomegranate_c27840	AT	68	9	4
pomegranate_c27922	AT	1	8	4
pomegranate_c29868	AT	2	12	6
pomegranate_c30570	AT	580	13	6
pomegranate_c30611	AT	122	10	5
pomegranate_c31530	AT	837	8	5
pomegranate_c33924	AT	4	11	5
pomegranate_c35226	AT	134	9	4
pomegranate_c37447	AT	731	18	9
pomegranate_c38534	AT	75	10	5
pomegranate_c43972	AT	396	10	5
pomegranate_c45016	AT	247	9	4
pomegranate_c47543	AT	1276	10	5
pomegranate_c50751	AT	669	9	4
pomegranate_c52945	AT	192	10	5
pomegranate_c53033	AT	1169	10	5
pomegranate_c55337	AT	489	8	4
pomegranate_c55878	AT	112	8	4
pomegranate_c56846	AT	504	8	4
pomegranate_c59129	AT	67	11	5
pomegranate_c59695	AT	388	12	6
pomegranate_c59971	AT	399	10	5
pomegranate_c59996	AT	77	11	5
pomegranate_c62805	AT	657	13	6
pomegranate_c63086	AT	4	14	7
pomegranate_c64455	AT	113	11	5
pomegranate_c66356	AT	521	9	4
pomegranate_rep_c10240	AT	1447	10	5
pomegranate_rep_c10264	AT	2377	16	8
pomegranate_rep_c1037	AT	79	9	4
pomegranate_rep_c1052	AT	35	9	4
pomegranate_rep_c10691	AT	990	9	4
pomegranate_rep_c10738	AT	801	8	4
pomegranate_rep_c11834	AT	3	14	7
pomegranate_rep_c11946	AT	1355	11	5
pomegranate_rep_c12735	AT	41	9	4
pomegranate_rep_c13005	AT	132	10	5
pomegranate_rep_c1303	AT	1511	10	5
pomegranate_rep_c13131	AT	426	11	5
pomegranate_rep_c13241	AT	3069	13	6
pomegranate_rep_c13398	AT	646	10	5
pomegranate_rep_c13398	AT	2264	8	4
pomegranate_rep_c13633	AT	1335	12	5
pomegranate_rep_c14041	AT	221	8	4
pomegranate_rep_c14345	AT	525	9	4
pomegranate_rep_c14578	AT	465	9	4
pomegranate_rep_c14628	AT	79	15	7
pomegranate_rep_c14664	AT	228	14	7
pomegranate_rep_c14694	AT	417	11	5
pomegranate_rep_c14976	AT	691	10	5
pomegranate_rep_c14999	AT	505	7	3
pomegranate_rep_c15210	AT	3	14	7
pomegranate_rep_c16175	AT	5	11	5
pomegranate_rep_c16223	AT	301	9	4
pomegranate_rep_c16425	AT	62	15	7
pomegranate_rep_c16835	AT	809	8	4
pomegranate_rep_c17325	AT	296	7	3
pomegranate_rep_c17610	AT	1439	8	4
pomegranate_rep_c17672	AT	425	12	6
pomegranate_rep_c17766	AT	961	10	5
pomegranate_rep_c1854	AT	1129	9	4
pomegranate_rep_c1880	AT	676	14	7
pomegranate_rep_c19104	AT	336	8	4
pomegranate_rep_c19400	AT	254	9	4
pomegranate_rep_c19413	AT	648	10	5
pomegranate_rep_c19828	AT	630	8	4
pomegranate_rep_c20245	AT	187	11	5
pomegranate_rep_c20601	AT	20	10	8
pomegranate_rep_c21124	AT	3	10	5
pomegranate_rep_c2139	AT	1532	10	5
pomegranate_rep_c2207	AT	169	10	8
pomegranate_rep_c22555	AT	132	8	4
pomegranate_rep_c22703	AT	1489	8	4
pomegranate_rep_c22774	AT	616	9	4
pomegranate_rep_c22975	AT	757	9	6
pomegranate_rep_c23065	AT	1432	10	6
pomegranate_rep_c23204	AT	54	10	5
pomegranate_rep_c23427	AT	372	7	3
pomegranate_rep_c23452	AT	988	10	5
pomegranate_rep_c23576	AT	453	8	4
pomegranate_rep_c23747	AT	106	10	5
pomegranate_rep_c23775	AT	1606	14	7
pomegranate_rep_c2389	AT	831	18	9
pomegranate_rep_c24099	AT	579	8	4
pomegranate_rep_c2411	AT	12	9	4
pomegranate_rep_c24118	AT	424	11	5
pomegranate_rep_c24249	AT	905	9	4
pomegranate_rep_c24276	AT	1584	9	4
pomegranate_rep_c24433	AT	108	11	5
pomegranate_rep_c24436	AT	95	10	5
pomegranate_rep_c24969	AT	1225	8	4
pomegranate_rep_c2497	AT	180	11	5
pomegranate_rep_c25042	AT	531	13	6
pomegranate_rep_c25951	AT	209	8	4
pomegranate_rep_c2609	AT	1317	12	6
pomegranate_rep_c26658	AT	451	8	4
pomegranate_rep_c2693	AT	772	11	7
pomegranate_rep_c27018	AT	496	14	7
pomegranate_rep_c27224	AT	697	8	5
pomegranate_rep_c27270	AT	94	14	7
pomegranate_rep_c27339	AT	506	10	5
pomegranate_rep_c2736	AT	992	9	4
pomegranate_rep_c27396	AT	152	10	6
pomegranate_rep_c27433	AT	600	11	5
pomegranate_rep_c27627	AT	241	12	6
pomegranate_rep_c2772	AT	2063	14	7
pomegranate_rep_c2796	AT	37	10	5
pomegranate_rep_c27995	AT	48	11	7
pomegranate_rep_c27995	AT	529	11	5
pomegranate_rep_c28113	AT	1342	7	5
pomegranate_rep_c2820	AT	1238	10	5
pomegranate_rep_c28806	AT	736	8	4
pomegranate_rep_c29422	AT	249	9	4
pomegranate_rep_c29426	AT	1926	13	6
pomegranate_rep_c29719	AT	349	9	4
pomegranate_rep_c30607	AT	161	9	4
pomegranate_rep_c30619	AT	206	12	6
pomegranate_rep_c30676	AT	708	9	4
pomegranate_rep_c31814	AT	572	9	4
pomegranate_rep_c32144	AT	1099	10	5
pomegranate_rep_c32270	AT	433	9	4
pomegranate_rep_c32359	AT	520	17	8
pomegranate_rep_c32440	AT	450	11	5
pomegranate_rep_c32475	AT	852	10	6
pomegranate_rep_c32476	AT	653	7	3
pomegranate_rep_c32611	AT	631	7	3
pomegranate_rep_c32781	AT	132	8	4
pomegranate_rep_c32934	AT	527	16	8
pomegranate_rep_c33143	AT	428	10	5
pomegranate_rep_c33286	AT	373	9	4
pomegranate_rep_c3332	AT	73	7	3
pomegranate_rep_c33465	AT	161	10	5
pomegranate_rep_c3348	AT	375	9	4
pomegranate_rep_c33568	AT	561	9	4
pomegranate_rep_c3389	AT	70	12	6
pomegranate_rep_c3396	AT	1219	8	4
pomegranate_rep_c34058	AT	485	9	6
pomegranate_rep_c342	AT	379	8	4
pomegranate_rep_c35861	AT	144	9	4
pomegranate_rep_c35921	AT	3	12	7
pomegranate_rep_c35921	AT	583	11	5
pomegranate_rep_c35921	AT	779	8	9
pomegranate_rep_c36141	AT	483	12	6
pomegranate_rep_c36160	AT	412	12	8
pomegranate_rep_c3652	AT	149	10	6
pomegranate_rep_c36752	AT	768	13	6
pomegranate_rep_c36792	AT	390	15	7
pomegranate_rep_c3708	AT	871	9	4
pomegranate_rep_c37308	AT	106	9	4
pomegranate_rep_c37600	AT	4	6	5
pomegranate_rep_c38146	AT	139	9	4
pomegranate_rep_c38430	AT	390	8	4
pomegranate_rep_c38434	AT	21	8	4
pomegranate_rep_c3863	AT	1254	11	5
pomegranate_rep_c39331	AT	547	7	3
pomegranate_rep_c39367	AT	738	8	4
pomegranate_rep_c39493	AT	835	15	7
pomegranate_rep_c40541	AT	354	11	5
pomegranate_rep_c40652	AT	353	11	5
pomegranate_rep_c41674	AT	97	10	5
pomegranate_rep_c4182	AT	485	12	6
pomegranate_rep_c41841	AT	804	9	4
pomegranate_rep_c42046	AT	488	10	5
pomegranate_rep_c42201	AT	291	10	5
pomegranate_rep_c42451	AT	117	9	4
pomegranate_rep_c4272	AT	1011	11	5
pomegranate_rep_c43171	AT	426	8	11
pomegranate_rep_c43741	AT	80	10	5
pomegranate_rep_c43995	AT	562	8	6
pomegranate_rep_c44085	AT	291	13	6
pomegranate_rep_c4420	AT	72	6	5
pomegranate_rep_c44233	AT	385	7	3
pomegranate_rep_c44335	AT	101	11	5
pomegranate_rep_c44486	AT	272	8	4
pomegranate_rep_c45312	AT	132	9	4
pomegranate_rep_c45472	AT	9	9	4
pomegranate_rep_c4656	AT	78	12	6
pomegranate_rep_c467	AT	792	9	4
pomegranate_rep_c47000	AT	411	12	6
pomegranate_rep_c47042	AT	303	10	5
pomegranate_rep_c48134	AT	92	12	8
pomegranate_rep_c48431	AT	685	8	4
pomegranate_rep_c4881	AT	56	14	7
pomegranate_rep_c49138	AT	428	11	5
pomegranate_rep_c49542	AT	592	12	6
pomegranate_rep_c4958	AT	326	12	6
pomegranate_rep_c49606	AT	113	12	6
pomegranate_rep_c50065	AT	222	9	4
pomegranate_rep_c5019	AT	1407	12	6
pomegranate_rep_c50234	AT	53	18	9
pomegranate_rep_c5071	AT	479	11	5
pomegranate_rep_c51027	AT	706	9	4
pomegranate_rep_c51204	AT	143	10	5
pomegranate_rep_c51478	AT	289	12	6
pomegranate_rep_c52157	AT	193	9	4
pomegranate_rep_c52192	AT	364	9	4
pomegranate_rep_c52256	AT	569	8	4
pomegranate_rep_c52260	AT	121	8	4
pomegranate_rep_c52570	AT	447	10	5
pomegranate_rep_c52706	AT	55	9	4
pomegranate_rep_c52708	AT	51	10	5
pomegranate_rep_c5322	AT	1519	14	7
pomegranate_rep_c53309	AT	169	10	8
pomegranate_rep_c53518	AT	235	10	5
pomegranate_rep_c53709	AT	374	11	5
pomegranate_rep_c53729	AT	60	8	4
pomegranate_rep_c54408	AT	652	11	5
pomegranate_rep_c546	AT	1469	8	4
pomegranate_rep_c54805	AT	272	11	5
pomegranate_rep_c55029	AT	145	11	5
pomegranate_rep_c55092	AT	228	8	4
pomegranate_rep_c55413	AT	578	9	4
pomegranate_rep_c55487	AT	407	9	4
pomegranate_rep_c5637	AT	9	10	5
pomegranate_rep_c56633	AT	48	8	4
pomegranate_rep_c57102	AT	131	12	6
pomegranate_rep_c57377	AT	98	10	5
pomegranate_rep_c57435	AT	411	7	3
pomegranate_rep_c57683	AT	163	16	8
pomegranate_rep_c57754	AT	374	9	4
pomegranate_rep_c58088	AT	60	8	4
pomegranate_rep_c58091	AT	180	11	5
pomegranate_rep_c58106	AT	133	8	4
pomegranate_rep_c58586	AT	407	10	5
pomegranate_rep_c58954	AT	247	7	3
pomegranate_rep_c5935	AT	909	11	5
pomegranate_rep_c59386	AT	477	11	5
pomegranate_rep_c595	AT	97	9	4
pomegranate_rep_c59687	AT	236	13	6
pomegranate_rep_c59932	AT	171	12	6
pomegranate_rep_c60082	AT	413	8	4
pomegranate_rep_c60934	AT	46	8	4
pomegranate_rep_c61185	AT	456	10	5
pomegranate_rep_c6157	AT	40	14	7
pomegranate_rep_c61635	AT	5	8	4
pomegranate_rep_c61883	AT	24	8	4
pomegranate_rep_c62	AT	8	9	4
pomegranate_rep_c6249	AT	32	9	4
pomegranate_rep_c62591	AT	65	10	5
pomegranate_rep_c62611	AT	221	8	4
pomegranate_rep_c62637	AT	57	11	5
pomegranate_rep_c62637	AT	233	8	4
pomegranate_rep_c62639	AT	278	10	5
pomegranate_rep_c6289	AT	34	7	3
pomegranate_rep_c63097	AT	898	10	5
pomegranate_rep_c63349	AT	242	9	4
pomegranate_rep_c6358	AT	652	19	9
pomegranate_rep_c6383	AT	47	8	4
pomegranate_rep_c63936	AT	280	8	4
pomegranate_rep_c64300	AT	265	7	3
pomegranate_rep_c64306	AT	30	11	5
pomegranate_rep_c6433	AT	2849	10	5
pomegranate_rep_c64447	AT	402	9	10
pomegranate_rep_c64826	AT	1	10	5
pomegranate_rep_c64901	AT	25	8	4
pomegranate_rep_c65128	AT	267	11	5
pomegranate_rep_c65303	AT	16	9	4
pomegranate_rep_c65517	AT	175	10	5
pomegranate_rep_c65616	AT	10	10	5
pomegranate_rep_c65854	AT	145	10	5
pomegranate_rep_c66071	AT	86	10	5
pomegranate_rep_c6616	AT	781	8	5
pomegranate_rep_c66503	AT	859	11	5
pomegranate_rep_c67451	AT	6	11	5
pomegranate_rep_c6777	AT	120	7	5
pomegranate_rep_c68062	AT	68	9	4
pomegranate_rep_c6829	AT	1214	15	7
pomegranate_rep_c6994	AT	33	7	3
pomegranate_rep_c7217	AT	2605	10	5
pomegranate_rep_c737	AT	1071	9	4
pomegranate_rep_c7722	AT	7	20	10
pomegranate_rep_c7726	AT	1271	10	5
pomegranate_rep_c7843	AT	1994	12	6
pomegranate_rep_c7973	AT	886	9	4
pomegranate_rep_c8013	AT	655	11	5
pomegranate_rep_c8243	AT	539	8	4
pomegranate_rep_c8366	AT	87	10	5
pomegranate_rep_c8466	AT	1909	11	5
pomegranate_rep_c8516	AT	1697	10	5
pomegranate_rep_c8611	AT	21	8	4
pomegranate_rep_c8633	AT	466	9	4
pomegranate_rep_c8649	AT	572	11	5
pomegranate_rep_c9215	AT	9	10	5
pomegranate_rep_c9302	AT	995	10	5
pomegranate_rep_c9353	AT	601	13	6
pomegranate_rep_c9387	AT	542	10	5
pomegranate_rep_c9411	AT	92	11	8
pomegranate_rep_c944	AT	1880	10	5
pomegranate_rep_c9464	AT	1714	11	5
pomegranate_rep_c9486	AT	2284	10	6
pomegranate_rep_c9827	AT	1053	8	8
pomegranate_rep_c9923	AT	899	10	5
pomegranate_c14801	ATA	78	6	4
pomegranate_c32152	ATA	14	13	8
pomegranate_c56263	ATA	359	5	3
pomegranate_c62761	ATA	239	5	3
pomegranate_c63742	ATA	450	5	3
pomegranate_rep_c12050	ATA	657	9	5
pomegranate_rep_c13398	ATA	1561	5	3
pomegranate_rep_c25470	ATA	78	7	4
pomegranate_rep_c26404	ATA	34	11	6
pomegranate_rep_c27479	ATA	178	5	3
pomegranate_rep_c3270	ATA	193	5	3
pomegranate_rep_c38146	ATA	15	7	5
pomegranate_rep_c42426	ATA	411	6	3
pomegranate_rep_c44983	ATA	17	7	4
pomegranate_rep_c45597	ATA	303	6	3
pomegranate_rep_c49342	ATA	894	11	6
pomegranate_rep_c52201	ATA	520	5	3
pomegranate_rep_c52438	ATA	296	5	3
pomegranate_rep_c63612	ATA	776	6	6
pomegranate_rep_c8865	ATA	28	11	6
pomegranate_rep_c14695	ATAA	206	8	5
pomegranate_rep_c48585	ATAA	102	6	4
pomegranate_c18440	ATAC	49	8	5
pomegranate_c62813	ATAC	15	8	5
pomegranate_rep_c12142	ATAC	60	6	4
pomegranate_rep_c13301	ATAC	48	7	5
pomegranate_rep_c24601	ATAC	771	5	3
pomegranate_rep_c2703	ATAC	24	5	3
pomegranate_rep_c45554	ATAC	306	6	4
pomegranate_rep_c47062	ATAC	66	5	3
pomegranate_c15395	ATAG	44	7	5
pomegranate_rep_c27462	ATAG	156	6	4
pomegranate_rep_c46741	ATAG	352	9	6
pomegranate_c12385	ATC	1041	7	4
pomegranate_c15204	ATC	1006	7	4
pomegranate_c17269	ATC	1777	5	3
pomegranate_c24606	ATC	930	5	3
pomegranate_c25258	ATC	39	6	4
pomegranate_c26099	ATC	407	6	4
pomegranate_c32776	ATC	618	9	5
pomegranate_c62370	ATC	534	5	3
pomegranate_rep_c10427	ATC	556	5	3
pomegranate_rep_c12810	ATC	542	6	3
pomegranate_rep_c13550	ATC	55	7	4
pomegranate_rep_c14013	ATC	398	6	4
pomegranate_rep_c14083	ATC	1	5	3
pomegranate_rep_c14109	ATC	1106	6	3
pomegranate_rep_c14484	ATC	1107	5	3
pomegranate_rep_c15876	ATC	279	5	3
pomegranate_rep_c16173	ATC	540	9	5
pomegranate_rep_c17178	ATC	418	5	3
pomegranate_rep_c19029	ATC	300	6	3
pomegranate_rep_c20778	ATC	886	5	3
pomegranate_rep_c21031	ATC	192	5	3
pomegranate_rep_c21835	ATC	629	5	3
pomegranate_rep_c26210	ATC	504	6	3
pomegranate_rep_c26516	ATC	502	5	3
pomegranate_rep_c26613	ATC	707	5	3
pomegranate_rep_c3336	ATC	626	5	3
pomegranate_rep_c4119	ATC	2102	9	6
pomegranate_rep_c41271	ATC	184	6	3
pomegranate_rep_c41834	ATC	15	10	6
pomegranate_rep_c42746	ATC	38	8	4
pomegranate_rep_c428	ATC	1069	6	3
pomegranate_rep_c4317	ATC	321	7	4
pomegranate_rep_c46507	ATC	682	5	3
pomegranate_rep_c50012	ATC	64	5	3
pomegranate_rep_c51301	ATC	312	6	3
pomegranate_rep_c52885	ATC	109	5	3
pomegranate_rep_c54562	ATC	349	6	3
pomegranate_rep_c5628	ATC	62	5	4
pomegranate_rep_c5696	ATC	683	7	4
pomegranate_rep_c59167	ATC	59	6	4
pomegranate_rep_c61766	ATC	750	5	3
pomegranate_rep_c63960	ATC	638	7	4
pomegranate_rep_c6651	ATC	1329	5	3
pomegranate_rep_c67002	ATC	106	8	5
pomegranate_rep_c6753	ATC	443	5	3
pomegranate_rep_c6809	ATC	18	5	3
pomegranate_rep_c68455	ATC	52	8	5
pomegranate_rep_c705	ATC	346	8	5
pomegranate_rep_c7533	ATC	2894	7	4
pomegranate_rep_c7971	ATC	1140	6	3
pomegranate_rep_c9322	ATC	382	6	3
pomegranate_rep_c19089	ATCAA	265	5	3
pomegranate_rep_c232	ATCAA	1707	5	3
pomegranate_rep_c52939	ATCAA	172	5	3
pomegranate_rep_c2036	ATCCC	123	5	3
pomegranate_rep_c23846	ATCT	369	5	3
pomegranate_rep_c4734	ATCT	970	7	5
pomegranate_rep_c65487	ATCT	133	5	3
pomegranate_rep_c11172	ATG	1532	7	4
pomegranate_rep_c13819	ATG	519	5	5
pomegranate_rep_c13892	ATG	477	6	3
pomegranate_rep_c15005	ATG	360	6	3
pomegranate_rep_c16771	ATG	681	5	3
pomegranate_rep_c18137	ATG	1918	5	4
pomegranate_rep_c22789	ATG	827	7	4
pomegranate_rep_c23701	ATG	136	10	6
pomegranate_rep_c27249	ATG	1453	6	3
pomegranate_rep_c28004	ATG	437	6	3
pomegranate_rep_c29359	ATG	498	6	4
pomegranate_rep_c29649	ATG	487	5	3
pomegranate_rep_c29974	ATG	179	6	3
pomegranate_rep_c33254	ATG	174	7	4
pomegranate_rep_c40255	ATG	3	6	3
pomegranate_rep_c51706	ATG	293	6	3
pomegranate_rep_c54985	ATG	201	12	7
pomegranate_rep_c56425	ATG	502	9	5
pomegranate_rep_c5759	ATG	887	7	4
pomegranate_rep_c60208	ATG	950	6	3
pomegranate_rep_c8110	ATG	740	6	6
pomegranate_rep_c16821	ATGC	1117	5	3
pomegranate_rep_c52703	ATGG	316	5	5
pomegranate_c29740	ATT	1078	7	4
pomegranate_c50853	ATT	670	12	7
pomegranate_c52947	ATT	353	5	3
pomegranate_c61692	ATT	566	5	3
pomegranate_c61878	ATT	64	5	3
pomegranate_rep_c12495	ATT	618	7	4
pomegranate_rep_c1447	ATT	39	6	3
pomegranate_rep_c17641	ATT	1033	10	6
pomegranate_rep_c25250	ATT	390	13	8
pomegranate_rep_c2659	ATT	1579	6	3
pomegranate_rep_c26797	ATT	6	6	3
pomegranate_rep_c31318	ATT	332	8	5
pomegranate_rep_c3153	ATT	1354	10	6
pomegranate_rep_c33210	ATT	560	6	3
pomegranate_rep_c44448	ATT	312	5	4
pomegranate_rep_c46925	ATT	177	5	3
pomegranate_rep_c50115	ATT	472	9	5
pomegranate_rep_c66538	ATT	394	6	4
pomegranate_rep_c6683	ATT	161	5	3
pomegranate_rep_c7811	ATT	20	5	3
pomegranate_rep_c7937	ATT	165	5	3
pomegranate_rep_c63042	ATTA	289	6	4
pomegranate_rep_c9213	ATTA	97	6	4
pomegranate_rep_c590	ATTG	1179	5	3
pomegranate_c56242	ATTT	461	5	3
pomegranate_rep_c27875	ATTT	503	5	3
pomegranate_rep_c30464	C	227	15	5
[truncated: 5,156 more rows]
